# Supplementary material
Source: PubMed Central journal article supplement (PMC7718390)
Supplement: NIHMS1636667-supplement-1.pdf [file NIHMS1636667-supplement-1.pdf]

## Supplementary Data

**Materials and Methods** (pages 1-7)

**Supplementary Figures** (pages 8-19)

**Fig.S1.** Expression of SNAI2 in HER2-positive tumors from patients.

**Fig.S2.** Metastasis capability, epithelial cell hierarchy, and ERBB2 expression in tumors from nulliparous and parous SNAI2 WT<sup>ErbB2+</sup> and SNAI2 KO<sup>ErbB2+</sup> mice.

**Fig.S3.** Tumor growth rate and white blood cell infiltration in breast tumors from Snai2 WT<sup>ErbB2+</sup> and Snai2 KO<sup>ErbB2+</sup> mice.

**Fig.S4.** ERK and pERK1/2 levels in tumors derived from Snai2 WT<sup>ErbB2+</sup> and Snai2 KO<sup>ErbB2+</sup> mice.

**Fig.S5.** Correlation between the AKT and ERK levels, and survival.

**Fig.S6.** The supernatant from CAF cells influences tumor cell migration by altering cytokine production.

**Supplementary Tables** (pages 20-35)

**Table S1.** Evaluation of the survival of patients with strong and weak tumor expression of SNAI2 in different subtypes of breast cancer.

**Table S2.** Clinical and histopathological characteristics of tumors from patients with ERBB2-positive breast cancer studied.

**Table S3.** Linear models for SNAI2 and Ki67.

**Table S4.** Differential expression analysis between nulliparous and parous WT *ErbB2*<sup>+</sup> mice.

**Table S5.** Quantification of angiogenic factors in mammary tumors of nulliparous versus parous mice using Luminex technology.

**Table S6.** SNAI1 expression and breast cancer in *Snai2*-deficient mice.

**Table S7.** Determination of the levels of some of the elements in the ERK1/2 and AKT signaling pathways in breast cancers from *Snai2* WT *ErbB2*<sup>+</sup> and *Snai2* KO *ErbB2*<sup>+</sup> nulliparous and parous mice, as determined by ELISA.

**Table S8.** Correlation between ERK1/2 and AKT levels quantified by ELISA with survival and tumor latency.

**Table S9.** Age of mice used in all experiments.

## **Supplementary methods**

### **SNAI2 quantification in human tumors**

The expression of SNAI2 in the human tumor epithelium and stroma was analyzed semi-quantitatively employing a three-point scale. SNAI2 expression in the epithelium was considered intense positive when it was detected in virtually all the tumor nuclei examined (always more than 75%). In contrast, it was considered focal positive when observed in less than 75% of the tumor nuclei (there were no tumors with negative expression of Snai2 in the epithelium). The stroma was considered to express SNAI2 (positive) when nuclear staining was evident at 4x magnification. Focal stromal staining (focal positive) was considered when there was occasional staining of fibroblasts (less than 50% evident at 20x magnification). When no staining was observed, the stroma was considered to be negative for SNAI2 expression. We evaluated HER2-positive (+++) and HER2-negative tumors. ER+ tumors were considered those with more than 10% positive cells. Ki-67 cut-off was considered in 15% of positive cells. PR+ tumors were those with more than 5% positive cells. The slides were all evaluated by two pathologists (MMAH and SFG) who were unaware of the clinical status of the patients.

### **Immunohistochemistry in mouse tissues**

To analyze the protein expression in mouse tumors, tumor sections (3  $\mu$ m) were deparaffinized and processed to detect cleaved CASPASE-3 after microwaving the tissue in citrate buffer (pH 6) to achieve antigen retrieval. The anti-Ki-67 (MAD020310Q, Master Diagnostica, Granada, Spain), anti-ERBB2 (Abcam, catalog number ab2428), anti-phospho-ERBB2 (Tyr1248) (Abcam, catalog number ab47755), anti-SNAI1/SNAI2 (Abcam, ab53519), and cleaved CASPASE-3 (Asp175; Cell Signaling) primary antibodies were used at a 1:50 dilution in the Ventana Discovery automated

immunohistochemistry research slide-staining system (Tucson, AZ85755). Ki-67, ERBB2, phospho-ERBB2(Tyr1248) and SNAI1/SNAIL expressing cells in tumors were quantified with the ARIOL-slide scanner software on tissue-array sections of tumors from *Snai2* WT<sup>ErbB2</sup> and *Snai2* KO<sup>ErbB2</sup> nulliparous and parous mice (10 tumors from each group), each stained in triplicate.

### **MEF generation**

To generate MEFs, embryos from *Snai2* WT<sup>ErbB2+</sup> and *Snai2* KO<sup>ErbB2+</sup> mice were isolated on day E13.5 of pregnancy. The embryo's head, limbs and most of the internal organs were removed, the tissue was minced and trypsinized for 30 min, and the cells recovered were seeded in culture dishes with 15 mL of complete DMEM. Once confluent, the MEFs were split at a ratio of 1:3, passaged twice and frozen or expanded for the different studies.

### **Cancer-associated fibroblasts**

Human fibroblasts and CAFs were obtained using a co-implantation breast tumor xenograft model, as described previously (29). Briefly, primary mammary hNFs were isolated from reduction mammoplasty tissue and immortalized with hTERT, the catalytic subunit of the telomerase holoenzyme. Retroviral constructs encoding GFP and the puromycin-resistance protein were also introduced into these fibroblasts. Mouse CAFs were obtained from tumors by flow cytometry, as indicated above.

### **ELISA**

The phosphorylated and total AKT2 or AKT3, and the total ERK, were measured using Sandwich ELISA Kits: pAKT2(Ser474) [catalog number 7932]; total AKT2 [catalog number 7930]; pAKT3(Ser472) [catalog number 7942]; total AKT3 [catalog number

7934]; and total ERK1/2 [catalog number 7050]. The levels of phosphorylated and total AKT1, and of phosphorylated ERK were measured using the ELISA Sandwich Antibody Pair, and by coating a 96-well Microtest Plate (BD Falcon, catalog number 353077) with capture antibody according to the manufacturer's instructions (Pathscan Cell Signaling Technology): pAKT (Thr308) [catalog number 7144]; pAKT1 (Ser473) [catalog number 7143]; total AKT1 [catalog number 7142]; pERK (Thr202/Tyr204) [catalog number 7246]. Absorbance was measured at 450 nm on a Synergy-4 Microplate Reader (Biotek). All assays using proteins from tumors were carried out with 5 µg of protein and serial dilutions (1:2) of the protein extracted from each tumor sample were assayed on each plate (3-50 µg) to control for inter-assay variability.

### **Protein analyses**

The proteins in the tumor samples were analyzed in western blots. Extracting proteins from the frozen tumor tissue in RIPA buffer (150 mM NaCl, 1% [v/v] NP40, 50 mM Tris-HCl [pH 8.0], 0.1% [v/v] SDS, 1 mM EDTA, 0.5% [w/v] Deoxycholate) containing protease and phosphatase inhibitor cocktails (Roche, Basel, Switzerland). The proteins were quantified with a BCA Protein Assay Kit (Thermo Fisher Scientific Inc., catalog number 23228, Waltham, MA USA), resolved by SDS-PAGE and transferred to polyvinylidene difluoride membranes (Immobilon-P, Millipore, Darmstadt, Germany) that were then probed with the following primary antibodies: anti-phospho-AKT1(Ser473, D9E, catalog number 3787); anti-AKT1 (2H10, catalog number 2967); anti-TUBULIN (DM1A, catalog number T6199: Sigma, St Louis, MO, USA); anti-CYCLIN D1 (C-20, sc-717: Santa Cruz, Dallas, TX, USA); anti- $\alpha$ SMA (E184, Abcam, catalog number ab32575), anti-SNAI2 (C19G17, Cell Signaling, catalog number 9584); anti-GAPDH (Sigma, catalog number G8795), anti-FAP (Abcam, catalog number ab53066); anti-S100A4 (Abcam, catalog number ab-27957); anti-ACTIN (C4, Santa Cruz Biotechnology, catalog number sc-47778); anti-ERBB2 (Abcam, catalog number

ab2428); anti-phospho-ERBB2(Tyr1248) (Abcam, catalog number ab47755); anti-HSP90 (4F10, Santa Cruz Biotechnology, sc-69703) and anti-SDF1 (D32F9, Cell Signaling, catalog number 3530). Antibody binding was detected with horseradish peroxidase-conjugated anti-mouse, anti-rabbit or anti-goat secondary antibodies (1:10,000 dilution: BIO-RAD, Berkeley, CA, USA), which were visualized by enhanced chemiluminescence (ECL, Thermo Scientific). The phosphorylated and total AKT2 or AKT3, and the total ERK, were measured by ELISA, as described in the supplementary methods.

### **Cytokine and growth factor quantification**

The cytokines and growth factors in tumor protein lysates were quantified by Luminex technology using Luminex xMAP kits and the Milliplex MAP Angiogenesis/Growth Factor Magnetic Bead Panel (#MAGPMAG-24K, Millipore), assessing: angiopoietin-2, sFASL, amphiregulin, betacellulin, EGF, endoglin, endothelin, FGF-2, follistatin, G-CSF, HGF, IL-1 $\beta$ , IL-6, IL-17A, KC, leptin, MIP-1 $\alpha$ , MCP-1, PLGF-2, prolactin, sALK-1, sCD31/PECAM 1, SDF-1, VEGF-A, VEGF-C, VEGF-D and TNF $\alpha$ . TGF $\beta$ 1, TGF $\beta$ 2 and TGF $\beta$ 3 were measured using the Milliplex MAP TGF $\beta$  Magnetic Bead 3 Plex Kit (#TGMAG64K-03, Millipore). Protein lysates were prepared in lysis buffer (#43-040, Millipore) and passed through a 0.65  $\mu$ m filter (Ultrafree-MC-DV, #UFC30DV00, Millipore). Each protein was quantified following the manufacturer's instructions and the amount of protein lysate loaded was optimized for each assay: 20  $\mu$ g for #MAGPMAG-24K and 13.5  $\mu$ g for TGMAG64K-03.

The cytokine levels in the culture supernatant from CAFs were quantified using a membrane panel and analyzed following the manufacturer's recommendations (Proteome Profiler™ Mouse Cytokine R&D Systems ARY006), incubating the membranes with the supernatant from CAFs isolated from *Snai2* WT<sup>ErbB2+</sup> and *Snai2*

KO<sup>ErbB2+</sup> tumors after six days of growth. This arrays screened for the relative levels of 40 different cytokines and chemokines, and their relative expression was quantified with Quantity One software.

### **Flow Cytometry and cell sorting**

For tumors from *Snai2* WT<sup>ErbB2+</sup> and *Snai2* KO<sup>ErbB2+</sup> mice, flow cytometry was used to analyze the stromal composition and immune cell infiltration, and to sort epithelial, endothelial cells and fibroblasts. Tumors were dissected out from female mice and after mechanical dissociation with two scalpels (Swann-Morton, catalog number 0511, Sheffield, United Kingdom), the tissue was digested with collagenase (600 units/mL: Sigma, C2674, St Louis, MO, USA) and hyaluronidase (200 units/ml: Sigma, H3506, St Louis, MO, USA) in culture medium (DMEM/F12, 10% FBS, 1% penicillin/streptomycin, 1% Glutamine). The tissue was digested for 2 hours at 37 °C to analyze infiltrating immune cells, or for 6 hours to sort and quantify the endothelial cells and fibroblasts.

Stromal leukocytes were quantified by flow cytometry. To quantify infiltrating immune cell populations, cell suspensions were stained with anti-B220-FITC (Becton Dickinson #553088), CD4-PE (Becton Dickinson #553048), CD8-PE (Becton Dickinson #553033) and CD45-APC (Becton Dickinson #559864), and the different CD45+ populations were analyzed on an AccuriC6 FACS apparatus (Becton Dickinson). Tumor cells were stained with anti-EpCAM to identify epithelial cells (Immunostep #M236PC7), anti-CD31-FITC to identify endothelial cells (Beckton Dickinson #553372), and anti-CD140-PE to identify fibroblasts (eBioscience #12-140-81), and they were then sorted on a FACS Aria III apparatus (Becton Dickinson). The cells were incubated with antibodies for 30 minutes at 4 °C, washed with 2% FBS in PBS (phosphate-buffered saline, wash buffer), and

resuspended in wash buffer with 1  $\mu$ M SYTOX blue to exclude dead cells from the analysis.

### **RNA extraction, cDNA synthesis and QPCR**

Total RNA was isolated using the TRIZOL Reagent (Invitrogen, Carlsbad, CA) and cDNAs were synthesized from equal amounts of RNA using the Transcriptor First-strand cDNA synthesis kit (Roche) to quantify *Snai2* expression. For the TaqMan assays, the primer and probe mixes were obtained from Applied Biosystems (*Snai2* #Mm00441531\_1, *Gapdh* #Mm99999915\_g1).

### **Gelatin zymography**

Gelatinase activity was assessed as described previously (68). The cell culture supernatants were collected and centrifuged at 1,500 rpm for 5 minutes and the cell-free supernatant was mixed with 2x sample buffer (non-reducing conditions) and separated for 1 hour on gels at 4 °C (10% polyacrylamide, 0.1% gelatin). The subsequent enzymatic reaction was performed at 37 °C overnight, visualizing the gelatinase activity using specific staining solutions and destaining in an acetic acid-methanol-dH<sub>2</sub>O solution (1:3:6). The gels were then analyzed semi-quantitatively using ImageJ software.

### **Cell-migration/invasion assay**

Cell migration was assayed in Boyden chambers, using a Falcon cell-culture insert with an 8  $\mu$ m pore-size polyethylene terephthalate membrane (Millipore). The cells were recovered by trypsinization and counted, and cell suspensions containing 5-10 $\times$ 10<sup>4</sup> cells in 300  $\mu$ l of serum-free medium were added to the upper chamber, with 500  $\mu$ l of the appropriate medium added to the lower chamber. The transwells were incubated for 24 hours at 37 °C, after which the cells on the inside of the transwell inserts were removed

with a cotton swab, while those on the underside of the insert fixed and stained. Photographs were taken of five random fields, and the cells were counted to calculate the proportion of transmigrated cells. The invasion was assayed using Boyden chambers with Matrigel (Cell Biolabs, #CBA-110).

### **QPCR reagents and conditions**

A reaction mixture (20  $\mu$ L) containing 9  $\mu$ L of the cDNA template and 10  $\mu$ L of the TaqMan Universal PCR master mix was amplified as follows: denaturation at 95 °C for 10 min, and 36 cycles at 95 °C for 15 s and 60 °C for 60 s. Gene expression was quantified in CD140<sup>+</sup> sorted cells, synthesizing cDNAs as described above and pre-amplifying for 12 cycles using the SsoAdvanced PreAmp Supermix (Bio-Rad) containing specific primers. The pre-amplification product was then used as a template in the qPCR reactions with PerfeCTa SYBR® Green SuperMix Reagent and amplified using the following program: denaturation at 95°C for 10 min, and 40 cycles at 95 °C for 15 s and 59 °C for 60 s. The primers used were: *Cxcl1* Forward (CCCAAACCGAAGTCATAGCCA) and Reverse (TTCTCCGTTACTTGGGGACAC), *Mmp2* Forward (TCGCCATCATCAAGTTCCC) and Reverse (CCTTGGGGCAGCCATAGAAA), *Mmp9* Forward (TTCCCCAAGACCTGAAAACCT) and Reverse (AAAGCCGGCCGTAGAGACT), *Sdf1* Forward (GAGAGCCACATCGCCAGAGC) and Reverse (GGATCCACTTTAATTTTCGGGTCAA) and *Gapdh* Forward (TGCACCACCAACTGCTTAG) and Reverse (GGATGCAGGGATGATGTTC), human *SDF1* Forward (CTAGTCAAGTGCGTCCACGA) and Reverse (GGACACACCACAGCACAAAC). QPCR results were analyzed by the  $\Delta\Delta$ CT method.

**Fig. S1. Expression of SNAI2 in HER2-positive tumors from patients.** Different levels of SNAI2 expression in the epithelium and stroma of human ERBB2-positive tumors determined by immunohistochemistry. (a) Epithelium with focal SNAI2. (b) Epithelium expressing SNAI2. (c) Stroma with focal SNAI2. (d) Stroma expressing SNAI2. (e) SNAI2 negative stroma. See the material and methods for more details.

Supplementary Figure S1



**Fig. S2. Metastasis capability and ERBB2 expression in tumors from nulliparous and parous *SNAI2* WT<sup>ErbB2</sup> and *SNAI2* KO<sup>ErbB2</sup> mice.** (A) Detection of SNAI2 in mouse embryonic fibroblasts (MEFs) and mammary glands in western blots. (B) Comparison of the absolute number of metastasis in nulliparous mice considering all mice with breast cancer. (C) The same comparison in the parous female mice. (D) Comparison of the absolute number of metastasis in nulliparous mice considering only tumors that metastasized. (E) The same comparison in parous mice. A Student's T-test was used for panels B-D. (F) Detection of pERBB2 and total ERBB2 in tumors assessed by western blots. (G) Quantification of ERBB2 and phospho-ERBB2 expression in tumors from both *Snai2* WT<sup>ErbB2</sup> and *Snai2* KO<sup>ErbB2</sup> nulliparous and parous female mice assessed by immunohistochemistry and quantified by the Ariol system. (H) SNAI2 expression in hCAF control (scrambled siRNA) and SNAI2-depleted cells with a different pool of two siRNAs (siRNA#2) (a different siRNA to that shown in Figure 2i) analyzed by immunoblotting. (I) Migration of MDA-MB-231 cells in the presence of conditioned medium from control or *SNAI2*-depleted hCAFs with the siRNA#2 (N=3).

# Supplementary Figure S2



**Fig. S3. Tumor growth rate and white blood cell infiltration in breast tumors from *Snai2* WT<sup>ErbB2</sup> and *Snai2* KO<sup>ErbB2</sup> mice.**

(A) Comparison of the growth rate of tumors from *Snai2* WT<sup>ErbB2</sup> and *Snai2* KO<sup>ErbB2</sup> nulliparous and parous mice. Mann-Whitney *U* test. (B) SNAI2 expression in CAF control and SNAI2-depleted cells analyzed by immunoblotting to show that the cells from which the conditioned medium (hCM) were collected, did not express SNAI2. (C, D) The proportion of intratumoral CD31<sup>+</sup> cells was quantified by flow cytometry. Mann-Whitney *U*-test. (E) KC expression analyzed by multiplex bead array (Luminex, 10 tumors per group were studied). Unpaired t-test. (F) Quantification of different intratumoral leukocyte subpopulations by flow cytometry. Mann-Whitney *U* test. (G) Detail of the expression of SNAI1/SNAIL in breast tumors from *Snai2* WT<sup>ErbB2</sup> and *Snai2* KO<sup>ErbB2</sup> mice by immunohistochemistry. SNAI1/SNAIL was expressed in the epithelial and stromal compartments (See also Table S6).

# Supplementary Figure S3



**Fig. S4. ERK and ERK1/2(T185/Y187: pERK1/2) levels in tumors derived from *Snai2* WT<sup>ErbB2+</sup> and *Snai2* KO<sup>ErbB2+</sup> mice.** (A and B) In nulliparous mice: (A) Total ERK1/2; (B) pERK1/2. (C and D) In parous mice: (C) total ERK1/2; (D) pERK1/2. The assays were carried out by ELISA (N = 20 mice per group were analyzed, Mann-Whitney *U* test). (E) Detection of total ERK1/2 and pERK1/2 by western blots of selected tumors (weaker and stronger expression) to confirm the sensitivity of the technique (N = 4 mice per group). (F) SNAI2 expression in CAF control and SNAI2-depleted cells analyzed by immunoblotting to show that SNAI2-targeting siRNA efficiently reduced the expression of SNAI2. (G) hCAFs cells were treated with control or *SNAI2* siRNA#2 for two days and then co-cultured in transwell inserts with BT474 cells for two days before analyzing the ERK and AKT signaling pathways in BT474 cells by western blots.

# Supplementary Figure 4



**Fig. S5. Correlation between the AKT and ERK tumor levels, and survival** in: **(A)** Snai2 WT *ErbB2*<sup>+/+</sup> parous mice and **(B)** Snai2 KO *ErbB2*<sup>+/+</sup> parous mice. The assays were carried out by ELISA (N = 20 mice per group, Spearman's Rank Order Correlation test).

# Supplementary Figure S5

**A**



**B**



**Fig. S6. Supernatant from CAF cells influences tumor cell migration by altering cytokine production.** (A) Densitometric quantification of cytokine arrays using ImageJ software. (B) Relative *Mmp2* mRNA expression in mCAFs isolated from tumors developed by parous mice (WT, N =8; KO, N =9: Mann-Whitney U test). (C) Relative *Cxcl1* and *Sdf1* mRNA expression in mCAFs from tumors developed by nulliparous mice (WT, N =8; KO, N =9: Mann-Whitney U test). (D) *Mmp2* and *Mmp9* mRNA expression was quantified in the same samples as in panel C. (Mann-Whitney U test). (E) pSMAD2, pSMAD3, total SMAD2/3 and SNAI2 expression were analyzed in the same samples as in panel F. (F) Effect of SDF1 treatment (10 ng/ml) on MDA-MB-231 cell migration (unpaired t-test). (G) Migration of MDA-MB-231 cells in the presence of conditioned medium from control or *SNAI2*-depleted hCAFs in the presence or absence of exogenous SDF1 (N=3, ANOVA). (H) Absence of correlation between the mRNA levels of stromal *SNAI2* and stromal *CXCL1* (Pearson's tests).

# Supplementary Figure S6



**Supplementary Table S1. Evaluation of the survival of patients with strong and weak tumor *SNAI2* expression in different subtypes of breast cancer.** Data were obtained with the Kaplan-Meier plotter (30). Breast cancer subtypes were defined based on the 2013 St Gallen criteria, using the expression of ER1, HER2 and Ki67: Luminal A tumors are defined as ER-positive (ER+), HER2-negative (HER-) and Ki67 low; Luminal B tumors are defined as ER+, HER- and Ki67 high, or ER+, HER+; Basal breast cancer is defined as ER-, HER-; and finally, HER2-enriched tumors as ER-, HER+ (Log Rank test, see also Figure 1A-F).

| Tumor subtype             |                           | StGallen definition                 | SNAI2 expression |      | Patients (n) | P- value    |
|---------------------------|---------------------------|-------------------------------------|------------------|------|--------------|-------------|
|                           |                           |                                     | Low              | High |              |             |
| <b>All tumors</b>         |                           | n.a.                                | 1976             | 1975 | 3951         | 0.3         |
| <b>Intrinsic subtypes</b> | Luminal A                 | ER+, HER2-, Ki67 low                | 966              | 967  | 1933         | 1           |
|                           | Luminal B                 | ER+, HER2-, Ki67 high or ER+, HER2+ | 574              | 575  | 1149         | 0.2         |
|                           |                           | HER2+, ER+                          | 57               | 57   | 114          | <b>0.06</b> |
|                           | Basal                     | ER-, HER2-                          | 309              | 309  | 618          | 0.09        |
|                           | HER2-enriched             | ER-, HER2+                          | 126              | 125  | 251          | 0.56        |
| <b>Pietenpol subtypes</b> | Basal-like 1              | n.a.                                | 86               | 38   | 124          | 0.78        |
|                           | Basal-like 2              | n.a.                                | 38               | 38   | 76           | 0.67        |
|                           | Immunomodulatory          | n.a.                                | 102              | 101  | 203          | 0.82        |
|                           | Mesenchymal               | n.a.                                | 88               | 89   | 177          | 0.69        |
|                           | Mesenchymal stem-like     | n.a.                                | 32               | 31   | 63           | 0.55        |
|                           | Luminal androgen-receptor | n.a.                                | 49               | 37   | 86           | 0.16        |

**Supplementary Table S2. Clinical and histopathological characteristics of tumors from patients with ERBB2-positive breast cancer evaluated by immunohistochemistry.** CPR, Complete Pathological Response (see also Figure 1K-N).

| Case number | Age at diagnosis | Tumor stage after surgery | Ki67 (%) | HER2 | PR (%) | ER % | SNAI2      |         | Time of Follow up (weeks) | Relapse / Progression | Type of relapse or progression |
|-------------|------------------|---------------------------|----------|------|--------|------|------------|---------|---------------------------|-----------------------|--------------------------------|
|             |                  |                           |          |      |        |      | Epithelial | Stromal |                           |                       |                                |
| 1           | 57               | pT1cN0                    | 10       | 3    | <5     | 40   | -          | +       | 269.7                     | No                    |                                |
| 2           | 49               | pT2N1                     | 50       | 3    | -      | -    | + focal    | +       | 222.4                     | Yes                   | Local and distance relapse     |
| 3           | 28               | pT1cN0                    | 10       | 3    | 90     | 90   | +          | +       | 263.1                     | No                    |                                |
| 4           | 59               | pT1aN1                    | 20       | 3    | -      | -    | -          | + focal | 261.1                     | No                    |                                |
| 5           | 39               | pT2N0                     | 10       | 3    | 1      | 75   | + focal    | +       | 816.7                     | Yes                   | Local relapse                  |
| 6           | 52               | pT1bN0                    | 12       | 3    | 60     | 50   | +          | +       | 259.0                     | No                    |                                |
| 7           | 37               | pT1cN1                    | 20       | 3    | 75     | 90   | + focal    | + focal | 255.9                     | No                    |                                |
| 8           | 56               | pT2N3                     | 20       | 3    | -      | -    | -          | + focal | 253.7                     | No                    |                                |
| 9           | 48               | pT3N2                     | 5        | 3    | <5     | 50   | + focal    | -       | 251.6                     | No                    |                                |
| 10          | 35               | pT2N2                     | 2        | 3    | -      | -    | + focal    | +       | 281.9                     | Yes                   | Distant metastasis             |
| 11          | 75               | pT2N1                     | 30       | 3    | 70     | 90   | +          | +       | 250.7                     | No                    |                                |
| 12          | 81               | pT2N3                     | 1        | 3    | 50     | 50   | + focal    | +       | 129.9                     | No                    |                                |
| 13          | 65               | pTisN0                    | <5       | 3    | -      | -    | +          | +       | 474.1                     | Yes                   | Local relapse                  |
| 14          | 50               | pT1aN1                    | 25       | 3    | <5     | 90   | -          | +       | 216.0                     | No                    |                                |
| 15          | 47               | ypT1cN1                   | 20       | 3    | 80     | 90   | + focal    | + focal | 164.7                     | No                    |                                |
| 16          | 58               | ypT0N0                    | 30       | 3    | -      | -    | +          | + focal | 199.0                     | No                    |                                |
| 17          | 86               | pT3N3M1                   | 70       | 3    | -      | <10  | + focal    | +       | 185.7                     | Yes                   | Metastasis at diagnosis        |
| 18          | 48               | pT3N3M0                   | 30       | 3    | -      | 70   | + focal    | + focal | 169.3                     | Yes                   | Distant metastasis             |
| 19          | 84               | pT1cN0M0                  | 1        | 3    | -      | 70   | +          | -       | 190.0                     | No                    |                                |
| 20          | 44               | pT2N0                     | 10       | 3    | -      | -    | + focal    | +       | 416.3                     | Yes                   | Local relapse                  |
| 21          | 91               | pT2N0                     | 20       | 3    | -      | 90   | +          | -       | 167.7                     | Yes                   | Local and ganglionic relapse   |
| 22          | 47               | pT2N0                     | 5        | 3    | -      | 90   | +          | +       | 178.0                     | No                    |                                |
| 23          | 76               | pT4N2a                    | 40       | 3    | -      | -    | +          | +       | 90.4                      | Yes                   | Distant metastasis             |
| 24          | 91               | ypT0N0                    | 5        | 3    | 50     | 100  | + focal    | +       | n.a.                      | n.a.                  | Exitus letalis                 |
| 25          | 72               | pTisN0                    | 5        | 3    | 70     | 100  | -          | + focal | 195.7                     | No                    |                                |
| 26          | 72               | pT1bN0                    | 10       | 3    | -      | -    | + focal    | + focal | 216.6                     | No                    |                                |
| 27          | 42               | pT3N2a                    | 20       | 3    | 75     | 90   | +          | + focal | 198.0                     | No                    |                                |
| 28          | 58               | pT1cN0                    | 20       | 3    | 75     | 90   | +          | -       | 846.4                     | No                    |                                |
| 29          | 49               | pT2pNmic                  | 70       | 3    | -      | 100  | + focal    | +       | 191.7                     | No                    |                                |
| 30          | 60               | pTisN0M0                  | 40       | 3    | -      | <10  | + focal    | +       | 847.0                     | Yes                   | Local relapse                  |
| 31          | 63               | pT1bN0                    | 10       | 3    | -      | -    | + focal    | +       | 716.1                     | Yes                   | Local relapse                  |
| 32          | 38               | ypT0N0                    | 20       | 3    | <1     | 80   | + focal    | +       | 114.1                     | No                    |                                |
| 33          | 30               | ypT1cN1                   | 25       | 3    | -      | 50   | + focal    | +       | 140.1                     | No                    |                                |
| 34          | 42               | cT2N2M1                   | 30       | 3    | <1     | 90   | + focal    | + focal | 150.0                     | No                    |                                |
| 35          | 91               | pT2N0                     | 50       | 3    | -      | 20   | +          | -       | 169.0                     | Yes                   | Local relapse                  |
| 36          | 57               | pT1aN0                    | 30       | 3    | -      | 5    | + focal    | + focal | 83.7                      | No                    |                                |
| 37          | 68               | pT1cN0                    | 15       | 3    | -      | 50   | +          | +       | 58.7                      | No                    |                                |
| 38          | 50               | ypT1bypNmic               | 60       | 3    | -      | -    | +          | +       | 37.7                      | No                    |                                |
| 39          | 54               | cT4N3M1                   | 40       | 3    | -      | 5    | +          | + focal | 67.0                      | Yes                   | Metastasis at diagnosis        |
| 40          | 48               | ypT2N0                    | 5        | 3    | -      | 90   | + focal    | -       | 82.7                      | No                    |                                |
| 41          | 53               | CPR                       | 50       | 3    | -      | 70   | +          | +       | 66.0                      | No                    |                                |
| 42          | 79               | pT1cN2                    | 30       | 3    | -      | 90   | +          | +       | 85.1                      | No                    |                                |
| 43          | 47               | ypT2N0                    | 35       | 3    | -      | 90   | +          | + focal | 6.1                       | No                    |                                |
| 44          | 61               | yPTx.pN2a                 | 40       | 3    | -      | -    | + focal    | + focal | 28.1                      | No                    |                                |
| 45          | 67               | ypT1cN0                   | 5        | 3    | -      | 5    | + focal    | -       | 53.0                      | No                    |                                |
| 46          | 83               | pT2N0M0                   | 30       | 3    | -      | 90   | + focal    | + focal | 49.0                      | No                    |                                |
| 47          | 93               | pT2Nmic                   | 70       | 3    | -      | -    | +          | + focal | 3.4                       | No                    |                                |
| 48          | 35               | pT2N1M0                   | 30       | 3    | -      | -    | + focal    | + focal | 574.0                     | Yes                   | Local and axillar relapse      |
| 49          | 35               | pT2N1M0                   | 10       | 3    | -      | -    | + focal    | +       | 50.0                      | No                    |                                |
| 50          | 60               | mpT2.pN3a                 | 5        | 3    | -      | 50   | +          | -       | 38.7                      | Yes                   | Distant metastasis             |

**Supplementary Table S3. Linear models for SNAI2 and Ki67.** The "glm" function of the R "stats" package was used to fit generalized linear models (logistic regression) (see also Figure 1O). A.) Stromal SNAI2. B.) Epithelial SNAI2.

| A.         |           | Stromal SNAI2 |            |         |          |          |         |         |         |         |        |    |
|------------|-----------|---------------|------------|---------|----------|----------|---------|---------|---------|---------|--------|----|
|            |           | Estimate      | Std. Error | z value | Pr(> z ) | Min      | 1Q      | Median  | 3Q      | Max     | AIC    | N  |
| All tumors | Intercept | 10 296        | 0.521      | 1 976   | 0.0481   |          |         |         |         |         |        |    |
|            | Ki-67     | 1 204         | 0.8002     | 1 505   | 0.1325   | -21 612  | 0.4512  | 0.4512  | 0.7815  | 0.7815  | 45 613 | 50 |
| ER-        | Intercept | 1 792         | 1.08       | 1 659   | 0.0971   |          |         |         |         |         |        |    |
|            | Ki-67     | 18 774        | 5 345 908  | 0.004   | 0.9972   | -197 277 | 0.00005 | 0.00005 | 0.55525 | 0.55525 | 97 416 | 18 |
| ER+        | Intercept | 0.6931        | 0.6124     | 1 132   | 0.258    |          |         |         |         |         |        |    |
|            | Ki-67     | 10 415        | 0.8759     | 1 189   | 0.234    | -19 479  | 0.5701  | 0.5701  | 0.6527  | 0.9005  | 36 185 | 32 |
| ER+PR+     | Intercept | 20.57         | 7929.26    | 0.003   | 0.996    |          |         |         |         |         |        |    |
|            | Ki-67     | -19.18        | 7929.26    | -0.002  | 0.996    | -179 412 | 0.00005 | 0.00005 | 0.66805 | 0.66805 | 9 004  | 10 |
| ER+PR-     | Intercept | -0.2877       | 0.7638     | -0.377  | 0.706    |          |         |         |         |         |        |    |
|            | Ki-67     | 21 595        | 10 772     | 2 005   | 0.045    | -20 074  | -0.6597 | 0.535   | 0.535   | 13 018  | 25 341 | 22 |

  

| B.         |           | Epithelial SNAI2 |            |         |          |          |         |         |         |         |        |    |
|------------|-----------|------------------|------------|---------|----------|----------|---------|---------|---------|---------|--------|----|
|            |           | Estimate         | Std. Error | z value | Pr(> z ) | Min      | 1Q      | Median  | 3Q      | Max     | AIC    | N  |
| All tumors | Intercept | 214 007          | 0.74751    | 2 863   | 0.0042   |          |         |         |         |         |        |    |
|            | Ki-67     | 0.09353          | 0.96319    | 0.097   | 0.9226   | -21 612  | 0.4512  | 0.4512  | 0.4717  | 0.4717  | 36 499 | 50 |
| ER-        | Intercept | 19.57            | 4064.63    | 0.005   | 0.996    |          |         |         |         |         |        |    |
|            | Ki-67     | -18.06           | 4064.63    | -0.004  | 0.996    | -184 648 | 0.00008 | 0.3168  | 0.63352 | 0.63352 | 14 431 | 18 |
| ER+        | Intercept | 16 094           | 0.7746     | 2 078   | 0.0377   |          |         |         |         |         |        |    |
|            | Ki-67     | 1 335            | 12 855     | 1 039   | 0.299    | -24 478  | 0.3203  | 0.3203  | 0.6039  | 0.6039  | 22 754 | 32 |
| ER+PR+     | Intercept | 1 386            | 1 118      | 1.24    | 0.215    |          |         |         |         |         |        |    |
|            | Ki-67     | 19.18            | 7 929 263  | 0.002   | 0.998    | -179 412 | 0.00005 | 0.00005 | 0.66805 | 0.66805 | 9 004  | 10 |
| ER+PR-     | Intercept | 17 918           | 10 801     | 1 659   | 0.0971   |          |         |         |         |         |        |    |
|            | Ki-67     | 0.8473           | 1 496      | 0.566   | 0.5711   | -23 272  | 0.3715  | 0.3715  | 0.5093  | 0.5553  | 17.09  | 22 |

**Supplementary Table S4. Differential expression analysis between nulliparous and parous *SnaI2* WT *Erbb2* mice.** The 602 gene probe set was obtained from a SAM test with a cut-off of FDR = 0.05 (~5% false positives). Overexpressed genes are shown in red and inhibited genes are shown in green.

|    | Probeset ID | d-value    | p-value     | q-value   | R fold    | Genename      | Description                                                                          |
|----|-------------|------------|-------------|-----------|-----------|---------------|--------------------------------------------------------------------------------------|
| 1  | 10459241    | 13.1721062 | 2.0089E-05  | 0.0321007 | 1.8114672 | Afap11        | actin filament associated protein 1-like 1                                           |
| 2  | 10507885    | 11.9890864 | 3.05353E-05 | 0.0321007 | 1.6596438 | Mycbp         | c-myc binding protein                                                                |
| 3  | 10446596    | -17.579075 | 6.42849E-06 | 0.0321007 | 0.0940015 | Dlqap1        | discs, large ( <i>Drosophila</i> ) homolog-associated protein 1                      |
| 4  | 10420837    | 10.9937752 | 4.74101E-05 | 0.0321007 | 1.409892  | Extl3         | exostosins (multiple)-like 3                                                         |
| 5  | 10513268    | 12.5177867 | 2.49104E-05 | 0.0321007 | 1.4905297 | AI314180      | expressed sequence AI314180                                                          |
| 6  | 10471360    | 11.2524334 | 4.25888E-05 | 0.0321007 | 1.2579993 | Golga2        | golgi autoantigen, golgin subfamily a, 2                                             |
| 7  | 10595371    | -11.651576 | 3.69638E-05 | 0.0321007 | 0.6919971 | Hmgn3         | high mobility group nucleosomal binding domain 3                                     |
| 8  | 10514668    | 15.6396282 | 9.64274E-06 | 0.0321007 | 1.7721342 | Jak1          | Janus kinase 1                                                                       |
| 9  | 10518372    | 11.7598168 | 3.45531E-05 | 0.0321007 | 1.6312772 | Miip          | migration and invasion inhibitory protein                                            |
| 10 | 10510957    | 11.8686858 | 3.2946E-05  | 0.0321007 | 1.5161356 | Pank4         | panthothenate kinase 4                                                               |
| 11 | 10514558    | -13.489281 | 1.76784E-05 | 0.0321007 | 0.6919462 | Gm12696       | predicted gene 12696                                                                 |
| 12 | 10421021    | -17.669108 | 5.62493E-06 | 0.0321007 | 0.7086152 | Gm6878        | predicted gene 6878                                                                  |
| 13 | 10485429    | 14.9975159 | 1.2857E-05  | 0.0321007 | 1.3806702 | Pdhx          | pyruvate dehydrogenase complex, component X                                          |
| 14 | 10481155    | 10.9405242 | 4.90172E-05 | 0.0321007 | 1.4859686 | Rexo4         | REX4, RNA exonuclease 4 homolog ( <i>S. cerevisiae</i> )                             |
| 15 | 10554129    | -14.866541 | 1.36605E-05 | 0.0321007 | 0.4167378 | B130024G19Rik | RIKEN cDNA B130024G19 gene                                                           |
| 16 | 10504926    | 15.3322532 | 1.12499E-05 | 0.0321007 | 1.5528957 | Rnf20         | ring finger protein 20                                                               |
| 17 | 10515700    | 17.9630504 | 4.01781E-06 | 0.0321007 | 1.50994   | Szt2          | seizure threshold 2                                                                  |
| 18 | 10515729    | 12.8695286 | 2.24997E-05 | 0.0321007 | 1.5026044 | Szt2          | seizure threshold 2                                                                  |
| 19 | 10515716    | 10.7865745 | 4.98208E-05 | 0.0321007 | 1.5495063 | Szt2          | seizure threshold 2                                                                  |
| 20 | 10506968    | 11.0538585 | 4.41958E-05 | 0.0321007 | 2.0530492 | Ttc39a        | tetratricopeptide repeat domain 39A                                                  |
| 21 | 10532839    | -14.829202 | 1.44641E-05 | 0.0321007 | 0.4657279 | Trpv4         | transient receptor potential cation channel, subfamily V, member 4                   |
| 22 | 10507804    | 12.0821412 | 2.81246E-05 | 0.0321007 | 1.7510043 | Trt1          | tRNA isopentenyltransferase 1                                                        |
| 23 | 10516229    | 11.7383499 | 3.53567E-05 | 0.0321007 | 1.3466567 | Utp11         | UTP11-like, U3 small nucleolar ribonucleoprotein, (yeast)                            |
| 24 | 10399407    | 15.3333429 | 1.04463E-05 | 0.0321007 | 17.91217  | Vsn1          | visinin-like 1                                                                       |
| 25 | 10544089    | 12.1764955 | 2.65175E-05 | 0.0321007 | 1.4083537 | Zc3hav1       | zinc finger CCHC type, antiviral 1                                                   |
| 26 | 10516007    | 13.4591002 | 1.84819E-05 | 0.0321007 | 1.4626186 | Zmpste24      | zinc metalloproteinase, STE24                                                        |
| 27 | 10514985    | 17.8971494 | 4.82137E-06 | 0.0321007 | 1.6666366 | Zyg11b        | zyg-II family member B, cell cycle regulator                                         |
| 28 | 10510814    | 10.775626  | 5.14279E-05 | 0.0321157 | 1.4646645 | Cep104        | centrosomal protein 104                                                              |
| 29 | 10478776    | 8.63435062 | 0.000168748 | 0.0331183 | 1.6045149 | Arfgef2       | ADP-ribosylation factor guanine nucleotide-exchange factor 2 (brefeldin A-inhibited) |
| 30 | 10592023    | -10.094837 | 7.8749E-05  | 0.0331183 | 0.7185447 | Aplp2         | amyloid beta (A4) precursor-like protein 2                                           |
| 31 | 10510552    | 9.75697976 | 9.1606E-05  | 0.0331183 | 1.4036022 | Rere          | arginine glutamic acid dipeptide (RE) repeats                                        |
| 32 | 10498710    | -8.8181013 | 0.00015348  | 0.0331183 | 0.1690807 | Bche          | butyrylcholinesterase                                                                |
| 33 | 10513583    | 10.3611971 | 7.07134E-05 | 0.0331183 | 1.5019706 | Cdc26         | cell division cycle 26                                                               |
| 34 | 10606513    | -8.7790401 | 0.000158302 | 0.0331183 | 0.8540778 | Chm           | choroideremia (RAB escort protein 1)                                                 |
| 35 | 10420225    | 10.7079696 | 5.78564E-05 | 0.0331183 | 1.2027628 | Cma1          | chymase 1, mast cell                                                                 |
| 36 | 10539822    | 9.17169359 | 0.000125356 | 0.0331183 | 1.0947324 | Copg1         | coatamer protein complex, subunit gamma 1                                            |
| 37 | 10507309    | 10.4653717 | 6.74992E-05 | 0.0331183 | 1.4648839 | Ccdc17        | coiled-coil domain containing 17                                                     |
| 38 | 10518957    | 10.5873611 | 6.18742E-05 | 0.0331183 | 1.316945  | Dfbb          | DNA fragmentation factor, beta subunit                                               |
| 39 | 10509542    | 10.582236  | 6.26778E-05 | 0.0331183 | 1.4448265 | Ddost         | dolichyl-di-phosphooligosaccharide-protein glycotransferase                          |
| 40 | 10588495    | 8.67675428 | 0.000165534 | 0.0331183 | 1.5889151 | Dusp7         | dual specificity phosphatase 7                                                       |
| 41 | 10509965    | 10.4599349 | 6.83027E-05 | 0.0331183 | 5.3454183 | Epha2         | Eph receptor A2                                                                      |
| 42 | 10452980    | 8.91649578 | 0.000143837 | 0.0331183 | 1.9098375 | Eif2ak2       | eukaryotic translation initiation factor 2-alpha kinase 2                            |
| 43 | 10510365    | 10.6976254 | 5.866E-05   | 0.0331183 | 1.5187966 | Exosc10       | exosome component 10                                                                 |
| 44 | 10508737    | 9.43220912 | 0.000108481 | 0.0331183 | 1.5561727 | Eya3          | eyes absent 3 homolog ( <i>Drosophila</i> )                                          |
| 45 | 10506989    | 9.0895173  | 0.000132588 | 0.0331183 | 1.6569404 | Faf1          | Fas-associated factor 1                                                              |
| 46 | 10405464    | 8.7118426  | 0.000162319 | 0.0331183 | 1.3863103 | Grk6          | G protein-coupled receptor kinase 6                                                  |
| 47 | 10386951    | -8.8189459 | 0.000152677 | 0.0331183 | 0.461421  | Hs3st3b1      | heparan sulfate (glucosamine) 3-O-sulfotransferase 3B1                               |
| 48 | 10466932    | 9.21211305 | 0.000120534 | 0.0331183 | 1.7389714 | Insl6         | insulin-like 6                                                                       |
| 49 | 10508883    | 9.13494677 | 0.000130177 | 0.0331183 | 1.5752423 | Kdfl          | keratinocyte differentiation factor 1                                                |
| 50 | 10506880    | 8.78520695 | 0.000156694 | 0.0331183 | 1.6997678 | Kif12         | KT12 homolog, chromatin associated ( <i>S. cerevisiae</i> )                          |
| 51 | 10507238    | 9.27220986 | 0.000115713 | 0.0331183 | 1.6261797 | Lrrcc41       | leucine rich repeat containing 41                                                    |
| 52 | 10535537    | -8.7833331 | 0.000157498 | 0.0331183 | 0.2127956 | Luzp2         | leucine zipper protein 2                                                             |
| 53 | 10517465    | 9.57368626 | 9.88381E-05 | 0.0331183 | 1.7631417 | Kdm1a         | lysine (K)-specific demethylase 1A                                                   |
| 54 | 10517425    | 8.90649404 | 0.000144641 | 0.0331183 | 1.654858  | Lypla2        | lysophospholipase 2                                                                  |
| 55 | 10510305    | 10.0695615 | 8.03561E-05 | 0.0331183 | 1.7073642 | Mtor          | mechanistic target of rapamycin (serine/threonine kinase)                            |
| 56 | 10507529    | 9.18840412 | 0.000122945 | 0.0331183 | 1.684721  | Med8          | mediator complex subunit 8                                                           |
| 57 | 10512901    | 8.61553681 | 0.000170355 | 0.0331183 | 1.4650093 | Mrpl50        | mitochondrial ribosomal protein L50                                                  |
| 58 | 10508829    | 9.06883137 | 0.000133391 | 0.0331183 | 1.5469267 | Map3k6        | mitogen-activated protein kinase kinase kinase 6                                     |
| 59 | 10596925    | 9.35262124 | 0.000111695 | 0.0331183 | 1.2584842 | Ndufaf3       | NADH dehydrogenase (ubiquinone) 1 alpha subcomplex, assembly factor 3                |
| 60 | 10356312    | -8.9764722 | 0.000140623 | 0.0331183 | 0.7963927 | Ncl           | nucleolin                                                                            |
| 61 | 10479411    | 8.65216602 | 0.000167944 | 0.0331183 | 1.776885  | Ogfr          | opioid growth factor receptor                                                        |
| 62 | 10515051    | 8.82898587 | 0.000151873 | 0.0331183 | 1.6397359 | Osbpl9        | oxysterol binding protein-like 9                                                     |
| 63 | 10550509    | -10.044151 | 8.19633E-05 | 0.0331183 | 0.0961    | Pglyrp1       | peptidoglycan recognition protein 1                                                  |
| 64 | 10585186    | 9.17002832 | 0.000126159 | 0.0331183 | 1.1579773 | Plet1         | placenta expressed transcript 1                                                      |
| 65 | 10565910    | -8.6730316 | 0.000166337 | 0.0331183 | 0.617499  | Plekhb1       | pleckstrin homology domain containing, family B (evectins) member 1                  |
| 66 | 10429843    | 9.93030488 | 8.35704E-05 | 0.0331183 | 1.4995393 | Parp10        | poly (ADP-ribose) polymerase family, member 10                                       |
| 67 | 10488594    | 9.92041754 | 8.51775E-05 | 0.0331183 | 1.3857773 | Rbck1         | RanBP-type and C3HC4-type zinc finger containing 1                                   |
| 68 | 10517744    | 9.06630695 | 0.000134195 | 0.0331183 | 1.5503899 | Arhgef10l     | Rho guanine nucleotide exchange factor (GEF) 10-like                                 |
| 69 | 10552252    | 8.97368072 | 0.000141427 | 0.0331183 | 1.3528307 | 1600014C10Rik | RIKEN cDNA 1600014C10 gene                                                           |
| 70 | 10437171    | 8.83844333 | 0.00015107  | 0.0331183 | 1.2032625 | 1700093J21Rik | RIKEN cDNA 1700093J21 gene                                                           |
| 71 | 10567735    | -9.4639533 | 0.000107677 | 0.0331183 | 0.9245197 | 3110040M04Rik | RIKEN cDNA 3110040M04 gene                                                           |
| 72 | 10383196    | 8.86319138 | 0.000148659 | 0.0331183 | 2.637517  | Rnf213        | ring finger protein 213                                                              |
| 73 | 10515731    | 10.3587295 | 7.1517E-05  | 0.0331183 | 1.5075272 | Szt2          | seizure threshold 2                                                                  |
| 74 | 10515649    | 10.1158507 | 7.79455E-05 | 0.0331183 | 1.4707188 | Szt2          | seizure threshold 2                                                                  |
| 75 | 10515737    | 9.55264538 | 0.000101249 | 0.0331183 | 1.3341152 | Szt2          | seizure threshold 2                                                                  |
| 76 | 10515735    | 9.28543774 | 0.000114106 | 0.0331183 | 1.5102695 | Szt2          | seizure threshold 2                                                                  |
| 77 | 10376007    | 8.62815563 | 0.000169551 | 0.0331183 | 1.9071001 | Shroom1       | shroom family member 1                                                               |
| 78 | 10404675    | -9.5672151 | 9.96416E-05 | 0.0331183 | 0.7103743 | Snmp48        | small nuclear ribonucleoprotein 48 (U11/U12)                                         |
| 79 | 10505630    | 8.71865701 | 0.000161516 | 0.0331183 | 1.7367444 | Snapc3        | small nuclear RNA activating complex, polypeptide 3                                  |
| 80 | 10507914    | 9.51209546 | 0.000104463 | 0.0331183 | 1.6113245 | Sf3a3         | splicing factor 3a, subunit 3                                                        |
| 81 | 10481147    | 8.97673274 | 0.00013982  | 0.0331183 | 1.562889  | Surf4         | surflet gene 4                                                                       |
| 82 | 10554863    | -8.6705961 | 0.000167141 | 0.0331183 | 0.4629362 | Sytl2         | synaptotagmin-like 2                                                                 |
| 83 | 10516982    | 9.29026738 | 0.000113302 | 0.0331183 | 1.5800723 | Stx12         | syntaxin 12                                                                          |
| 84 | 10448593    | 9.54816059 | 0.000103659 | 0.0331183 | 1.2945878 | Traf7         | TNF receptor-associated factor 7                                                     |
| 85 | 10550316    | 9.54873792 | 0.000102856 | 0.0331183 | 1.2928507 | Tmem160       | transmembrane protein 160                                                            |
| 86 | 10461012    | 9.41583091 | 0.000109284 | 0.0331183 | 1.364831  | Trmt112       | tRNA methyltransferase 11-2                                                          |
| 87 | 10518642    | 9.4145545  | 0.00010088  | 0.0331183 | 1.5362541 | Ube4b         | ubiquitination factor E4B                                                            |
| 88 | 10518228    | 9.25719268 | 0.00011732  | 0.0331183 | 1.3976341 | Vps13d        | vacuolar protein sorting 13 D (yeast)                                                |
| 89 | 10399421    | -9.8638117 | 8.59811E-05 | 0.0331183 | 0.705222  | Mycn          | v-myc myelocytomatosis viral related oncogene, neuroblastoma derived (avian)         |
| 90 | 10506668    | 10.7289079 | 5.46422E-05 | 0.0331183 | 1.618357  | Yip1          | Yip1 domain family, member 1                                                         |
| 91 | 10509998    | 10.4428993 | 6.91063E-05 | 0.0331183 | 1.4862889 | Zbtb17        | zinc finger and BTB domain containing 17                                             |

|     |          |            |             |           |           |               |                                                                                             |
|-----|----------|------------|-------------|-----------|-----------|---------------|---------------------------------------------------------------------------------------------|
| 92  | 10570963 | -9.190257  | 0.000122141 | 0.0331183 | 0.9064918 | Zmat4         | zinc finger, matrin type 4                                                                  |
| 93  | 10371603 | -8.5535218 | 0.000175176 | 0.0331971 | 0.8890669 | Gm6653        | predicted gene 6653                                                                         |
| 94  | 10515012 | 8.58893818 | 0.000172766 | 0.0331971 | 1.3657554 | Prpf38a       | PRP38 pre-mRNA processing factor 38 (yeast) domain containing A                             |
| 95  | 10489127 | 8.56009805 | 0.000174373 | 0.0331971 | 1.2539191 | Rbl1          | retinoblastoma-like 1 (p107)                                                                |
| 96  | 10411287 | 8.5215632  | 0.000177587 | 0.0333735 | 1.4311153 | Btf3l4        | basic transcription factor 3-like 4                                                         |
| 97  | 10431229 | -8.4854246 | 0.000184016 | 0.0342958 | 0.601381  | Celsr1        | cadherin, EGF LAG seven-pass G-type receptor 1 (flamingo homolog, Drosophila)               |
| 98  | 10572378 | -8.3727501 | 0.000200087 | 0.0350164 | 0.3143347 | Comp          | cartilage oligomeric matrix protein                                                         |
| 99  | 10414661 | -8.3366018 | 0.000203301 | 0.0350164 | 0.8502977 | Hk1           | hexokinase 1                                                                                |
| 100 | 10513020 | 8.31983539 | 0.000205712 | 0.0350164 | 1.6633143 | Ikbkap        | inhibitor of kappa light polypeptide enhancer in B cells, kinase complex-associated protein |
| 101 | 10514830 | 8.3426047  | 0.000202497 | 0.0350164 | 1.6934189 | Ttc4          | tetratricopeptide repeat domain 4                                                           |
| 102 | 10508468 | 8.42417063 | 0.000192855 | 0.0350164 | 1.4441017 | Tmem234       | transmembrane protein 234                                                                   |
| 103 | 10517312 | 8.41387802 | 0.000196069 | 0.0350164 | 1.4422663 | Tmem57        | transmembrane protein 57                                                                    |
| 104 | 10509379 | 8.32288497 | 0.000204908 | 0.0350164 | 1.4821152 | Usp48         | ubiquitin specific peptidase 48                                                             |
| 105 | 10366038 | 8.31652956 | 0.000206515 | 0.0350164 | 1.3792807 | Galt4         | UDP-N-acetyl-alpha-D-galactosamine:polypeptide N-acetylgalactosaminyltransferase 4          |
| 106 | 10478774 | 8.1794936  | 0.000223339 | 0.0361322 | 1.5713664 | Arfgef2       | ADP-ribosylation factor guanine nucleotide-exchange factor 2 (brefeldin A-inhibited)        |
| 107 | 10510452 | 8.11618399 | 0.000229819 | 0.0361322 | 1.5133688 | Dffa          | DNA fragmentation factor, alpha subunit                                                     |
| 108 | 10510604 | 8.04157485 | 0.000245086 | 0.0361322 | 1.6268481 | Dnajc11       | DnaJ (Hsp40) homolog, subfamily C, member 11                                                |
| 109 | 10515528 | 8.16126777 | 0.000226604 | 0.0361322 | 1.3478193 | Dph2          | DPH2 homolog (S. cerevisiae)                                                                |
| 110 | 10481909 | 7.94267567 | 0.000259555 | 0.0361322 | 1.3468512 | Fbxw2         | F-box and WD-40 domain protein 2                                                            |
| 111 | 10508019 | 8.0598769  | 0.000242676 | 0.0361322 | 1.5351475 | Gnl2          | guanine nucleotide binding protein-like 2 (nucleolar)                                       |
| 112 | 10533720 | 7.93637441 | 0.000261157 | 0.0361322 | 1.7242791 | Hcar2         | hydroxycarboxylic acid receptor 2                                                           |
| 113 | 10513397 | 8.22204446 | 0.000217765 | 0.0361322 | 1.6610459 | Inip          | INTS3 and NABP interacting protein                                                          |
| 114 | 10507218 | 7.92241069 | 0.000262765 | 0.0361322 | 1.8614835 | Mknk1         | MAP kinase-interacting serine/threonine kinase 1                                            |
| 115 | 10597648 | 8.07616558 | 0.000239461 | 0.0361322 | 1.3562011 | Myd88         | myeloid differentiation primary response gene 88                                            |
| 116 | 10394392 | 8.04079745 | 0.000246693 | 0.0361322 | 1.5675456 | Nfyc          | nuclear transcription factor-Y gamma                                                        |
| 117 | 10518546 | 8.08223463 | 0.00023464  | 0.0361322 | 1.4625788 | Pex14         | peroxisomal biogenesis factor 14                                                            |
| 118 | 10474028 | 8.18041583 | 0.000222587 | 0.0361322 | 1.3965483 | Pex16         | peroxisomal biogenesis factor 16                                                            |
| 119 | 10497399 | -8.0010356 | 0.000253925 | 0.0361322 | 0.6239982 | Pde7a         | phosphodiesterase 7A                                                                        |
| 120 | 10405866 | -8.0704692 | 0.000241068 | 0.0361322 | 0.6711832 | Gm10139       | predicted gene 10139                                                                        |
| 121 | 10519096 | 8.01736251 | 0.000251515 | 0.0361322 | 1.637015  | Rer1          | RER1 retention in endoplasmic reticulum 1 homolog (S. cerevisiae)                           |
| 122 | 10383194 | 7.94460511 | 0.000258747 | 0.0361322 | 2.2139404 | Rnf213        | ring finger protein 213                                                                     |
| 123 | 10515733 | 8.15060698 | 0.000227408 | 0.0361322 | 1.5551542 | Szt2          | seizure threshold 2                                                                         |
| 124 | 10481457 | 8.08624293 | 0.000232229 | 0.0361322 | 1.4113076 | Sh3glb2       | SH3-domain GRB2-like endophilin B2                                                          |
| 125 | 10513952 | 7.93620574 | 0.000261961 | 0.0361322 | 1.4329411 | Tmem261       | transmembrane protein 261                                                                   |
| 126 | 10535231 | 8.0766318  | 0.000238658 | 0.0361322 | 1.6237844 | Tlyh3         | tweety homolog 3 (Drosophila)                                                               |
| 127 | 10383200 | 7.91061816 | 0.000265979 | 0.0362427 | 2.3715297 | Rnf213        | ring finger protein 213                                                                     |
| 128 | 10444068 | 7.90975163 | 0.000266782 | 0.0362427 | 1.7045197 | Tapbp         | TAP binding protein                                                                         |
| 129 | 10537463 | -7.8752621 | 0.000271604 | 0.0366742 | 0.8287651 | Agk           | acylglycerol kinase                                                                         |
| 130 | 10508805 | 7.86721165 | 0.000273211 | 0.0366742 | 1.594074  | Wasf2         | WAS protein family, member 2                                                                |
| 131 | 10516393 | 7.77381781 | 0.000290889 | 0.0370526 | 1.5269343 |               | 38200 argonaute RISC catalytic subunit 4                                                    |
| 132 | 10508454 | 7.77761403 | 0.000289282 | 0.0370526 | 1.5302709 | Bsdc1         | BSD domain containing 1                                                                     |
| 133 | 10517250 | 7.74682014 | 0.000294103 | 0.0370526 | 3.5753377 | Extl1         | exostosins (multiple)-like 1                                                                |
| 134 | 10394971 | 7.76767301 | 0.000291693 | 0.0370526 | 1.2411067 | Klf11         | Kruppel-like factor 11                                                                      |
| 135 | 10507213 | 7.83387231 | 0.00028205  | 0.0370526 | 1.4404692 | Mob3c         | MOB kinase activator 3C                                                                     |
| 136 | 10383198 | 7.83773191 | 0.000279639 | 0.0370526 | 2.3641792 | Rnf213        | ring finger protein 213                                                                     |
| 137 | 10516666 | 7.82626999 | 0.000283657 | 0.0370526 | 1.7493571 | Tlx1a         | taxilin alpha                                                                               |
| 138 | 10517443 | 7.81504928 | 0.000286068 | 0.0370526 | 1.4530487 | Tceb3         | transcription elongation factor B (SII), polypeptide 3                                      |
| 139 | 10512766 | 7.81716856 | 0.000285264 | 0.0370526 | 2.6814182 | Trim14        | tripartite motif-containing 14                                                              |
| 140 | 10446986 | -7.6996746 | 0.000303746 | 0.0373202 | 0.5778747 | Crim1         | cysteine rich transmembrane BMP regulator 1 (chordin like)                                  |
| 141 | 10508182 | 7.71073216 | 0.000301336 | 0.0373202 | 1.6215104 | Psmb2         | proteasome (prosome, macropain) subunit, beta type 2                                        |
| 142 | 10515072 | 7.70837996 | 0.000302139 | 0.0373202 | 1.5342323 | Rnf11         | ring finger protein 11                                                                      |
| 143 | 10383202 | 7.69854877 | 0.00030455  | 0.0373202 | 2.2980061 | Rnf213        | ring finger protein 213                                                                     |
| 144 | 10471201 | 7.66507785 | 0.000309371 | 0.0374958 | 1.3310932 | Abl1          | c-abl oncogene 1, non-receptor tyrosine kinase                                              |
| 145 | 10588836 | 7.65219946 | 0.000312585 | 0.0374958 | 1.5880168 | Gmppb         | GDP-mannose pyrophosphorylase B                                                             |
| 146 | 10546661 | -7.6399143 | 0.000316603 | 0.037571  | 0.5817561 | Foxp1         | forkhead box P1                                                                             |
| 147 | 10471571 | 7.63758578 | 0.000317407 | 0.037571  | 1.5060814 | Mapkap1       | mitogen-activated protein kinase associated protein 1                                       |
| 148 | 10516427 | 7.63637476 | 0.00031821  | 0.037571  | 1.6547352 | Ncdn          | neurochondrin                                                                               |
| 149 | 10385081 | -7.6065274 | 0.000320621 | 0.0376584 | 0.7331383 | Anp32-ps      | acidic (leucine-rich) nuclear phosphoprotein 32 family, pseudogene                          |
| 150 | 10524631 | 7.58271902 | 0.000331871 | 0.0379816 | 2.8740429 | Oasl1         | 2'-5' oligoadenylate synthetase-like 1                                                      |
| 151 | 10508686 | 7.58806939 | 0.000328657 | 0.0379816 | 1.4666625 | Mecr          | mitochondrial trans-2-enoyl-CoA reductase                                                   |
| 152 | 10584827 | -7.591761  | 0.000327853 | 0.0379816 | 0.5190104 | Mpz12         | myelin protein zero-like 2                                                                  |
| 153 | 10515337 | 7.57676547 | 0.000333478 | 0.0379816 | 1.5446351 | Nasp          | nuclear autoantigenic sperm protein (histone-binding)                                       |
| 154 | 10584870 | 7.58437463 | 0.000331067 | 0.0379816 | 1.7715366 | Trmprs13      | transmembrane protease, serine 13                                                           |
| 155 | 10517028 | 7.58690638 | 0.00032946  | 0.0379816 | 1.4886189 | Tmem222       | transmembrane protein 222                                                                   |
| 156 | 10383365 | 7.52745585 | 0.000349549 | 0.038266  | 1.0710922 | Hqs           | HGF-regulated tyrosine kinase substrate                                                     |
| 157 | 10518585 | 7.53624593 | 0.000343924 | 0.038266  | 1.8452698 | Kif1b         | kinesin family member 1B                                                                    |
| 158 | 10506893 | 7.53536973 | 0.000345531 | 0.038266  | 1.6466549 | Nrd1          | nardilysin, N-arginine dibasic convertase, NRD convertase 1                                 |
| 159 | 10497372 | 7.53618705 | 0.000344728 | 0.038266  | 1.3853371 | Gm5150        | predicted gene 5150                                                                         |
| 160 | 10508697 | 7.53150827 | 0.000347139 | 0.038266  | 1.5164494 | Srsf4         | serine/arginine-rich splicing factor 4                                                      |
| 161 | 10508860 | 7.53387694 | 0.000346335 | 0.038266  | 1.6360198 | Slc9a1        | solute carrier family 9 (sodium/hydrogen exchanger), member 1                               |
| 162 | 10517328 | 7.55644818 | 0.000339103 | 0.038266  | 1.4721908 | Tmem50a       | transmembrane protein 50A                                                                   |
| 163 | 10403842 | 7.51510851 | 0.000353567 | 0.0383137 | 1.2602456 | Elmo1         | engulfment and cell motility 1                                                              |
| 164 | 10515590 | 7.49803381 | 0.000356781 | 0.0383137 | 1.5139241 | Kdm4a         | lysine (K)-specific demethylase 4A                                                          |
| 165 | 10383212 | 7.50047092 | 0.000355174 | 0.0383137 | 2.6366992 | Rnf213        | ring finger protein 213                                                                     |
| 166 | 10514896 | 7.49863172 | 0.000355978 | 0.0383137 | 1.2675096 | Tceanc2       | transcription elongation factor A (SII) N-terminal and central domain containing 2          |
| 167 | 10507203 | 7.48187683 | 0.000360799 | 0.0384651 | 1.6234067 | Atpaf1        | ATP synthase mitochondrial F1 complex assembly factor 1                                     |
| 168 | 10509868 | 7.48162794 | 0.000361603 | 0.0384651 | 1.4151643 | Atp13a2       | ATPase type 13A2                                                                            |
| 169 | 10363392 | 7.39450591 | 0.000376067 | 0.0388078 | 1.1224096 | Dnajb12       | DnaJ (Hsp40) homolog, subfamily B, member 12                                                |
| 170 | 10450069 | 7.39417956 | 0.00037687  | 0.0388078 | 1.6982329 | H2-K2         | histocompatibility 2, K region locus 2                                                      |
| 171 | 10507961 | 7.39484023 | 0.000375263 | 0.0388078 | 1.4955282 | Mtf1          | metal response element binding transcription factor 1                                       |
| 172 | 10484888 | 7.42213926 | 0.000370442 | 0.0388078 | 1.304951  | Ptprj         | protein tyrosine phosphatase, receptor type, J                                              |
| 173 | 10463911 | -7.3171237 | 0.000408209 | 0.0388946 | 0.5903582 | Add3          | adducin 3 (gamma)                                                                           |
| 174 | 10515352 | 7.33850449 | 0.000400174 | 0.0388946 | 1.4046893 | Akr1a1        | aldo-keto reductase family 1, member A1 (aldehyde reductase)                                |
| 175 | 10509178 | 7.27408167 | 0.000422673 | 0.0388946 | 1.9373643 | Asap3         | ArfGAP with SH3 domain, ankyrin repeat and PH domain 3                                      |
| 176 | 10516348 | 7.29300601 | 0.000418655 | 0.0388946 | 1.5654384 |               | 38334 argonaute RISC catalytic subunit 3                                                    |
| 177 | 10476817 | 7.32247682 | 0.000406602 | 0.0388946 | 1.7082485 | Atpaf1        | ATP synthase mitochondrial F1 complex assembly factor 1                                     |
| 178 | 10470381 | 7.3646092  | 0.000388924 | 0.0388946 | 1.5300661 | Cacfd1        | calcium channel flower domain containing 1                                                  |
| 179 | 10478799 | 7.29464509 | 0.000417048 | 0.0388946 | 1.6552579 | Cse1l         | chromosome segregation 1-like (S. cerevisiae)                                               |
| 180 | 10542310 | -7.3537624 | 0.000394549 | 0.0388946 | 0.7075075 | Cdkn1b        | cyclin-dependent kinase inhibitor 1B                                                        |
| 181 | 10546685 | 7.31703091 | 0.000409013 | 0.0388946 | 1.8705558 | Eif4e3        | eukaryotic translation initiation factor 4E member 3                                        |
| 182 | 10346303 | -7.3772054 | 0.000385709 | 0.0388946 | 0.7542481 | Hspe1         | heat shock protein 1 (chaperonin 10)                                                        |
| 183 | 10487359 | 7.33107109 | 0.000400977 | 0.0388946 | 1.6221629 | Itrp1l1       | inositol 1,4,5-triphosphate receptor interacting protein-like 1                             |
| 184 | 10506397 | 7.29454684 | 0.000417852 | 0.0388946 | 1.6552579 | Mier1         | mesoderm induction early response 1 homolog (Xenopus laevis)                                |
| 185 | 10437224 | 7.3233751  | 0.000405798 | 0.0388946 | 4.4187165 | Mx2           | MX dynamin-like GTPase 2                                                                    |
| 186 | 10531370 | 7.34736992 | 0.000396959 | 0.0388946 | 1.5956261 | Naaa          | N-acylethanolamine acid amidase                                                             |
| 187 | 10515242 | 7.32223803 | 0.000407406 | 0.0388946 | 1.4171254 | Nsun4         | NOL1/NOP2/Sun domain family, member 4                                                       |
| 188 | 10489043 | 7.27908987 | 0.000421066 | 0.0388946 | 1.4228422 | 2900097C17Rik | RIKEN cDNA 2900097C17 gene                                                                  |
| 189 | 10511321 | 7.37795096 | 0.000384906 | 0.0388946 | 1.05746   | 9430025C20Rik | RIKEN cDNA 9430025C20 gene                                                                  |

|     |          |            |             |           |           |          |                                                                                          |
|-----|----------|------------|-------------|-----------|-----------|----------|------------------------------------------------------------------------------------------|
| 190 | 10383206 | 7.30158214 | 0.000413834 | 0.0388946 | 2.4082888 | Rnf213   | ring finger protein 213                                                                  |
| 191 | 10456717 | -7.3253465 | 0.000404995 | 0.0388946 | 0.6627768 | Snord58b | small nucleolar RNA, C/D box 58B                                                         |
| 192 | 10544732 | -7.3390977 | 0.00039937  | 0.0388946 | 0.5655842 | Skap2    | src family associated phosphoprotein 2                                                   |
| 193 | 10545720 | -7.266206  | 0.00042428  | 0.0388946 | 0.8710797 | Stambp   | STAM binding protein                                                                     |
| 194 | 10509023 | 7.32919117 | 0.000401781 | 0.0388946 | 1.5344353 | Syf2     | SYF2 homolog, RNA splicing factor (S. cerevisiae)                                        |
| 195 | 10506870 | 7.27551949 | 0.00042187  | 0.0388946 | 1.8639093 | Txndc12  | thioredoxin domain containing 12 (endoplasmic reticulum)                                 |
| 196 | 10507677 | 7.26093249 | 0.000430709 | 0.0392993 | 1.5836706 | Hivep3   | human immunodeficiency virus type I enhancer binding protein 3                           |
| 197 | 10482229 | 7.25411031 | 0.000433923 | 0.0392993 | 1.2804225 | Psmb7    | proteasome (prosome, macropain) subunit, beta type 7                                     |
| 198 | 10516296 | 7.26002159 | 0.000432316 | 0.0392993 | 1.3923063 | Thrap3   | thyroid hormone receptor associated protein 3                                            |
| 199 | 10391207 | 7.23632871 | 0.000439548 | 0.0393226 | 2.6938332 | Dhx58    | DEXH (Asp-Glu-X-His) box polypeptide 58                                                  |
| 200 | 10482486 | 7.24178363 | 0.000437941 | 0.0393226 | 1.3938467 | Mmadhc   | methylmalonic aciduria (cobalamin deficiency) cblD type, with homocystinuria             |
| 201 | 10510982 | 7.23989351 | 0.000438745 | 0.0393226 | 1.5844681 | Pex10    | peroxisomal biogenesis factor 10                                                         |
| 202 | 10514398 | 7.20702469 | 0.000444369 | 0.0394532 | 1.5560658 | Caap1    | caspase activity and apoptosis inhibitor 1                                               |
| 203 | 10383214 | 7.20005445 | 0.00044678  | 0.0395117 | 2.2883236 | Rnf213   | ring finger protein 213                                                                  |
| 204 | 10480121 | 7.18177982 | 0.000452405 | 0.0398111 | 1.6681647 | Fam188a  | family with sequence similarity 188, member A                                            |
| 205 | 10507299 | 7.14887531 | 0.000457226 | 0.0398111 | 1.3698646 | Gpbp111  | GC-rich promoter binding protein 1-like 1                                                |
| 206 | 10566144 | 7.16075271 | 0.000455619 | 0.0398111 | 1.9715583 | Trim21   | tripartite motif-containing 21                                                           |
| 207 | 10540622 | 7.14385468 | 0.000461244 | 0.0399919 | 1.2391526 | Brpf1    | bromodomain and PHD finger containing, 1                                                 |
| 208 | 10420316 | -7.1388189 | 0.000462851 | 0.0399919 | 0.8448114 | Gm10873  | predicted gene 10873                                                                     |
| 209 | 10383233 | 7.13586911 | 0.000466066 | 0.040116  | 2.1978507 | Rnf213   | ring finger protein 213                                                                  |
| 210 | 10446136 | -7.0630067 | 0.000487762 | 0.040656  | 0.7015725 | Catsperd | catsper channel auxiliary subunit delta                                                  |
| 211 | 10455472 | 7.06762933 | 0.000485351 | 0.040656  | 1.2839216 | Dcp2     | DCP2 decapping enzyme homolog (S. cerevisiae)                                            |
| 212 | 10508190 | 7.07828681 | 0.000483744 | 0.040656  | 1.6093811 | AU040320 | expressed sequence AU040320                                                              |
| 213 | 10506298 | 7.06915538 | 0.000484548 | 0.040656  | 1.5336105 | Leprot   | leptin receptor overlapping transcript                                                   |
| 214 | 10383168 | 7.06606849 | 0.000486155 | 0.040656  | 2.1537995 | Rnf213   | ring finger protein 213                                                                  |
| 215 | 10517243 | 7.04681387 | 0.000493387 | 0.0408228 | 1.462245  | Pdik1l   | PDLIM1 interacting kinase 1 like                                                         |
| 216 | 10508619 | 7.04534527 | 0.00049419  | 0.0408228 | 1.4738906 | Pum1     | pumilio RNA-binding family member 1                                                      |
| 217 | 10384940 | -7.0407375 | 0.000498208 | 0.0410045 | 0.7224565 | Erlc1    | endoplasmic reticulum lectin 1                                                           |
| 218 | 10385926 | 6.9910209  | 0.000512672 | 0.0413193 | 1.2345732 | Cdc42se2 | CDC42 small effector 2                                                                   |
| 219 | 10454564 | 6.97950011 | 0.00051669  | 0.0413193 | 1.2009843 | Ercc3    | excision repair cross-complementing rodent repair deficiency, complementation group 3    |
| 220 | 10561498 | -6.9913392 | 0.000511065 | 0.0413193 | 0.6494816 | Papl     | iron/zinc purple acid phosphatase-like                                                   |
| 221 | 10534324 | 7.02125369 | 0.00050544  | 0.0413193 | 1.5003519 | Limk1    | LIM-domain containing, protein kinase                                                    |
| 222 | 10374793 | 6.99860925 | 0.000509458 | 0.0413193 | 1.3664808 | Pnpt1    | polynucleotide nucleotidyltransferase 1                                                  |
| 223 | 10383152 | 6.98494453 | 0.000515083 | 0.0413193 | 2.3091518 | Rnf213   | ring finger protein 213                                                                  |
| 224 | 10521667 | -6.9051059 | 0.000548832 | 0.0413448 | 0.4948866 | Bst1     | bone marrow stromal cell antigen 1                                                       |
| 225 | 10507557 | 6.87726672 | 0.000561689 | 0.0413448 | 1.5138069 | Ebna1bp2 | EBNA1 binding protein 2                                                                  |
| 226 | 10421394 | 6.86935843 | 0.0005641   | 0.0413448 | 1.2259839 | Fam160b2 | family with sequence similarity 160, member B2                                           |
| 227 | 10603151 | -6.9553233 | 0.000526333 | 0.0413448 | 0.544998  | Gpm6b    | glycoprotein m6b                                                                         |
| 228 | 10483110 | 6.92973475 | 0.000537583 | 0.0413448 | 2.8771594 | Ifih1    | interferon induced with helicase C domain 1                                              |
| 229 | 10469289 | 6.89647322 | 0.000551243 | 0.0413448 | 1.8419616 | Il15ra   | interleukin 15 receptor, alpha chain                                                     |
| 230 | 10492355 | -6.9265867 | 0.000539993 | 0.0413448 | 0.1110699 | Mme      | membrane metallo endopeptidase                                                           |
| 231 | 10406614 | -6.9253646 | 0.0005416   | 0.0413448 | 0.6961461 | Mtx3     | metaxin 3                                                                                |
| 232 | 10501909 | -6.8678717 | 0.000564904 | 0.0413448 | 0.7805685 | Mettl14  | methyltransferase like 14                                                                |
| 233 | 10515295 | 6.94139275 | 0.000533565 | 0.0413448 | 1.9280461 | Mast2    | microtubule associated serine/threonine kinase 2                                         |
| 234 | 10354054 | 6.90968601 | 0.000548029 | 0.0413448 | 1.5353056 | Mitd1    | MIT, microtubule interacting and transport, domain containing 1                          |
| 235 | 10415408 | -6.9487368 | 0.000528743 | 0.0413448 | 0.3167655 | Nynrin   | NYN domain and retroviral integrase containing                                           |
| 236 | 10516576 | 6.93968096 | 0.000535172 | 0.0413448 | 1.4246277 | Rbbp4    | retinoblastoma binding protein 4                                                         |
| 237 | 10508392 | 6.88760033 | 0.000552621 | 0.0413448 | 1.9594409 | Rnf19b   | ring finger protein 19B                                                                  |
| 238 | 10505008 | 6.88298937 | 0.000556868 | 0.0413448 | 1.4942676 | Slc44a1  | solute carrier family 44, member 1                                                       |
| 239 | 10443110 | -6.9495872 | 0.00052794  | 0.0413448 | 0.7558806 | Synqap1  | synaptic Ras GTPase activating protein 1 homolog (rat)                                   |
| 240 | 10508135 | 6.93181337 | 0.000535975 | 0.0413448 | 1.587252  | Trappc3  | trafficking protein particle complex 3                                                   |
| 241 | 10466374 | 6.9268121  | 0.00053919  | 0.0413448 | 1.6062538 | Tle4     | transducin-like enhancer of split 4, homolog of Drosophila E(spl)                        |
| 242 | 10516859 | 6.95412129 | 0.000527136 | 0.0413448 | 1.4307658 | Ythdf2   | YTH domain family 2                                                                      |
| 243 | 10516435 | 6.89106505 | 0.00053654  | 0.0413448 | 1.4909889 | Zmyhm4   | zinc finger, MYM-type 4                                                                  |
| 244 | 10401564 | 6.85977339 | 0.000569725 | 0.0413627 | 1.5040197 | Arel1    | apoptosis resistant E3 ubiquitin protein ligase 1                                        |
| 245 | 10516640 | 6.83723858 | 0.000576957 | 0.0413627 | 1.7914203 | Eif3i    | eukaryotic translation initiation factor 3, subunit 1                                    |
| 246 | 10514466 | 6.83573131 | 0.000577761 | 0.0413627 | 1.5161916 | Jun      | jun proto-oncogene                                                                       |
| 247 | 10415413 | -6.843228  | 0.000573743 | 0.0413627 | 0.2871578 | Nynrin   | NYN domain and retroviral integrase containing                                           |
| 248 | 10598279 | -6.7415883 | 0.000617135 | 0.0419022 | 0.9070725 | Akap4    | A kinase (PRKA) anchor protein 4                                                         |
| 249 | 10494322 | -6.7405321 | 0.000617939 | 0.0419022 | 0.7096312 | Anp32e   | acidic (leucine-rich) nuclear phosphoprotein 32 family, member E                         |
| 250 | 10435676 | -6.7681682 | 0.000605885 | 0.0419022 | 0.8541321 | Gsk3b    | glycogen synthase kinase 3 beta                                                          |
| 251 | 10434719 | -6.7428496 | 0.000616332 | 0.0419022 | 0.889362  | Kng1     | kininogen 1                                                                              |
| 252 | 10502778 | -6.7382896 | 0.000618742 | 0.0419022 | 0.6622789 | Lphn2    | latrophilin 2                                                                            |
| 253 | 10541410 | -6.744857  | 0.000615528 | 0.0419022 | 0.869534  | Mug1     | murinoglobulin 1                                                                         |
| 254 | 10409240 | 6.79285744 | 0.000596243 | 0.0419022 | 1.4381887 | Sema4d   | sema domain, immunoglobulin domain (Ig), transmembrane domain (TM)                       |
| 255 | 10367224 | 6.77882373 | 0.00060026  | 0.0419022 | 3.1443313 | Stat2    | signal transducer and activator of transcription 2                                       |
| 256 | 10470768 | 6.77043398 | 0.000603475 | 0.0419022 | 1.3774313 | Urm1     | ubiquitin related modifier 1 homolog (S. cerevisiae)                                     |
| 257 | 10397912 | -6.7752024 | 0.000610664 | 0.0419022 | 0.2047604 | Unc79    | unc-79 homolog (C. elegans)                                                              |
| 258 | 10478754 | 6.71361677 | 0.000631599 | 0.042248  | 1.577323  | Arqef2   | ADP-ribosylation factor guanine nucleotide-exchange factor 2 (brefeldin A-inhibited)     |
| 259 | 10410207 | -6.6959572 | 0.000638831 | 0.042248  | 0.7775571 | Cbx3     | chromobox 3                                                                              |
| 260 | 10405874 | -6.6959572 | 0.000638831 | 0.042248  | 0.7775571 | Cbx3     | chromobox 3                                                                              |
| 261 | 10405868 | -6.6944739 | 0.000639635 | 0.042248  | 0.7788154 | Cbx3     | chromobox 3                                                                              |
| 262 | 10545528 | -6.6969792 | 0.000637224 | 0.042248  | 0.7319566 | Pi3p     | phosphatidylinositol glycan anchor biosynthesis, class P                                 |
| 263 | 10518145 | 6.68824761 | 0.000644456 | 0.042248  | 1.3247996 | Prdm2    | PR domain containing 2, with ZNF domain                                                  |
| 264 | 10515714 | 6.72135067 | 0.000626778 | 0.042248  | 1.2262996 | Szt2     | seizure threshold 2                                                                      |
| 265 | 10414659 | -6.6944144 | 0.000640438 | 0.042248  | 0.6810549 | Snord58b | small nucleolar RNA, C/D box 58B                                                         |
| 266 | 10514133 | 6.71576719 | 0.000630796 | 0.042248  | 2.8480866 | Ttc39b   | tetratricopeptide repeat domain 39B                                                      |
| 267 | 10383204 | 6.6824554  | 0.000649278 | 0.0424007 | 2.2580497 | Rnf213   | ring finger protein 213                                                                  |
| 268 | 10544133 | 6.66774922 | 0.000654099 | 0.0426323 | 2.8794752 | Parp12   | poly (ADP-ribose) polymerase family, member 12                                           |
| 269 | 10507606 | 6.65403425 | 0.000662938 | 0.0427293 | 1.4044289 | Ccdc23   | coiled-coil domain containing 23                                                         |
| 270 | 10603567 | -6.6461801 | 0.000666956 | 0.0427293 | 0.7985207 | Dynlt3   | dynein light chain Tctex-type 3                                                          |
| 271 | 10506736 | 6.64633675 | 0.000666152 | 0.0427293 | 1.5479161 | Magoh    | mago-nashi homolog, proliferation-associated (Drosophila)                                |
| 272 | 10561335 | 6.64683441 | 0.000665349 | 0.0427293 | 1.7204415 | Prkcz    | protein kinase C, zeta                                                                   |
| 273 | 10490544 | 6.65018752 | 0.000663742 | 0.0427293 | 1.2353558 | Ythd1    | YTH domain family 1                                                                      |
| 274 | 10393668 | -6.6170959 | 0.000674188 | 0.0429486 | 0.7289744 | Aatk     | apoptosis-associated tyrosine kinase                                                     |
| 275 | 10582719 | 6.62696201 | 0.000673384 | 0.0429486 | 1.4276828 | Sipa1l2  | signal-induced proliferation-associated 1 like 2                                         |
| 276 | 10362186 | 6.60873725 | 0.000679009 | 0.0429562 | 5.0231237 | Moxd1    | monooxygenase, DBH-like 1                                                                |
| 277 | 10416709 | -6.6086708 | 0.000679813 | 0.0429562 | 0.8320566 | Tdrd3    | tudor domain containing 3                                                                |
| 278 | 10482517 | 6.59345797 | 0.000687849 | 0.0429692 | 2.0602285 | Nmi      | N-myc (and STAT) interactor                                                              |
| 279 | 10517666 | 6.59407199 | 0.000687045 | 0.0429692 | 1.4353099 | Otud3    | OTU domain containing 3                                                                  |
| 280 | 10509500 | 6.59157395 | 0.000691063 | 0.043032  | 1.4428832 | Hp1bp3   | heterochromatin protein 1, binding protein 3                                             |
| 281 | 10565341 | -6.5871307 | 0.00069267  | 0.043032  | 0.6682399 | Gm6155   | predicted pseudogene 6155                                                                |
| 282 | 10425923 | -6.5739957 | 0.000698295 | 0.0431061 | 0.6448408 | Fam118a  | family with sequence similarity 118, member A                                            |
| 283 | 10506201 | 6.57497355 | 0.000696688 | 0.0431061 | 1.2984803 | Ror1     | receptor tyrosine kinase-like orphan receptor 1                                          |
| 284 | 10508217 | 6.56844174 | 0.000700706 | 0.0431061 | 1.210078  | Sfpq     | splicing factor proline/glutamine rich (polypyrimidine tract binding protein associated) |
| 285 | 10595171 | 6.55897992 | 0.00070392  | 0.0431367 | 1.2120167 | Mb21d1   | Mab-21 domain containing 1                                                               |
| 286 | 10346678 | -6.5218921 | 0.000720795 | 0.043231  | 0.632919  | Carf     | calcium response factor                                                                  |
| 287 | 10509053 | 6.54884409 | 0.000709545 | 0.043231  | 1.6946716 | Ifih1    | interferon lambda receptor 1                                                             |

|     |          |            |             |           |           |               |                                                                                               |
|-----|----------|------------|-------------|-----------|-----------|---------------|-----------------------------------------------------------------------------------------------|
| 288 | 10517060 | 6.5313824  | 0.000716777 | 0.043231  | 1.3341442 | Nudc          | nuclear distribution gene C homolog (Aspergillus)                                             |
| 289 | 10383012 | 6.52852106 | 0.00071758  | 0.043231  | 1.3949713 | Pgs1          | phosphatidylglycerophosphate synthase 1                                                       |
| 290 | 10514070 | 6.52822409 | 0.000718384 | 0.043231  | 1.6752651 | 2310067E19Rik | RIKEN cDNA 2310067E19 gene                                                                    |
| 291 | 10502395 | -6.5459273 | 0.000711955 | 0.043231  | 0.9146519 | 4930579F01Rik | RIKEN cDNA 4930579F01 gene                                                                    |
| 292 | 10505064 | 6.52234142 | 0.000719991 | 0.043231  | 1.5700788 | Tmem38b       | transmembrane protein 38B                                                                     |
| 293 | 10442396 | -6.4946214 | 0.000732044 | 0.0432925 | 0.612822  | Abca3         | ATP-binding cassette, sub-family A (ABC1), member 3                                           |
| 294 | 10505044 | 6.49923689 | 0.000729634 | 0.0432925 | 1.5331561 | Fktn          | fukutin                                                                                       |
| 295 | 10600504 | -6.5006265 | 0.00072883  | 0.0432925 | 0.6534496 | Fundc2        | FUN14 domain containing 2                                                                     |
| 296 | 10505282 | 6.49225819 | 0.000733652 | 0.0432925 | 1.6431826 | Prpf4         | PRP4 pre-mRNA processing factor 4 homolog (yeast)                                             |
| 297 | 10513195 | 6.49718835 | 0.000731241 | 0.0432925 | 1.1399376 | Txn1          | thioredoxin 1                                                                                 |
| 298 | 10509218 | 6.49077776 | 0.000735259 | 0.0432925 | 1.5231434 | Zfp46         | zinc finger protein 46                                                                        |
| 299 | 10423134 | -6.5017562 | 0.000727223 | 0.0432925 | 0.7375132 | Zfr           | zinc finger RNA binding protein                                                               |
| 300 | 10476287 | 6.47076955 | 0.000746509 | 0.0433885 | 1.3269442 | Pank2         | pantothenate kinase 2                                                                         |
| 301 | 10508608 | 6.47095125 | 0.000745705 | 0.0433885 | 1.5424859 | Pef1          | penta-EF hand domain containing 1                                                             |
| 302 | 10374934 | 6.47475887 | 0.000742491 | 0.0433885 | 1.346326  | Psme4         | proteasome (prosome, macropain) activator subunit 4                                           |
| 303 | 10515698 | 6.47313404 | 0.000744098 | 0.0433885 | 1.3804444 | Szt2          | seizure threshold 2                                                                           |
| 304 | 10501608 | 6.47365502 | 0.000743294 | 0.0433885 | 1.8144491 | Vcam1         | vascular cell adhesion molecule 1                                                             |
| 305 | 10442625 | 6.46555572 | 0.000752937 | 0.0436306 | 1.4982142 | Igfals        | insulin-like growth factor binding protein, acid labile subunit                               |
| 306 | 10441601 | 6.46381967 | 0.000754544 | 0.0436306 | 1.7252397 | Tagap         | T cell activation Rho GTPase activating protein                                               |
| 307 | 10605571 | -6.4469756 | 0.00076258  | 0.0437587 | 0.5665126 | Gyk           | glycerol kinase                                                                               |
| 308 | 10428192 | -6.4514024 | 0.000760169 | 0.0437587 | 0.7470607 | Pabpc1        | poly(A) binding protein, cytoplasmic 1                                                        |
| 309 | 10490632 | 6.43536843 | 0.000765794 | 0.0437631 | 2.3433827 | Helz2         | helicase with zinc finger 2, transcriptional coactivator                                      |
| 310 | 10518113 | 6.42859443 | 0.000770615 | 0.0437631 | 1.6729889 | Kazn          | kazrin, periactin interacting protein                                                         |
| 311 | 10469936 | -6.421173  | 0.000775437 | 0.0437631 | 0.7550302 | Nrarp         | Notch-regulated ankyrin repeat protein                                                        |
| 312 | 10484577 | 6.43272826 | 0.000768205 | 0.0437631 | 1.0857848 | Olfir1049     | olfactory receptor 1049                                                                       |
| 313 | 10404187 | -6.4229504 | 0.000774633 | 0.0437631 | 0.8316163 | Tdp2          | tyrosyl-DNA phosphodiesterase 2                                                               |
| 314 | 10589596 | 6.40614346 | 0.000782669 | 0.043842  | 1.1845861 | Ccdc12        | coiled-coil domain containing 12                                                              |
| 315 | 10597564 | -6.4044267 | 0.000783472 | 0.043842  | 0.7707576 | Cmc1          | COX assembly mitochondrial protein 1                                                          |
| 316 | 10518857 | 6.3934133  | 0.000785883 | 0.043868  | 1.2542564 | Zbtb48        | zinc finger and BTB domain containing 48                                                      |
| 317 | 10471953 | 6.38161852 | 0.000793115 | 0.0439465 | 1.3236552 | Acvr2a        | activin receptor IIA                                                                          |
| 318 | 10487871 | 6.36215257 | 0.000805169 | 0.0439465 | 1.383565  | Cenpb         | centromere protein B                                                                          |
| 319 | 10442870 | -6.3732311 | 0.000799544 | 0.0439465 | 0.9207504 | Ccdc78        | coiled-coil domain containing 78                                                              |
| 320 | 10355152 | -6.3742177 | 0.000797936 | 0.0439465 | 0.6453239 | Fzd5          | frizzled homolog 5 (Drosophila)                                                               |
| 321 | 10488879 | 6.36079827 | 0.000806776 | 0.0439465 | 1.5048914 | Gss           | glutathione synthetase                                                                        |
| 322 | 10506004 | 6.37804457 | 0.000796329 | 0.0439465 | 1.4769059 | Hook1         | hook homolog 1 (Drosophila)                                                                   |
| 323 | 10376033 | -6.3857124 | 0.000792312 | 0.0439465 | 0.8269589 | Kif3a         | kinesin family member 3A                                                                      |
| 324 | 10480921 | 6.370276   | 0.000801151 | 0.0439465 | 1.4340046 | Qsox2         | quiescin Q6 sulfhydryl oxidase 2                                                              |
| 325 | 10586064 | -6.3574494 | 0.000810793 | 0.043953  | 0.7879897 | Anp32a        | acidic (leucine-rich) nuclear phosphoprotein 32 family, member A                              |
| 326 | 10516678 | 6.35754666 | 0.000809186 | 0.043953  | 1.5789803 | Kpna6         | karyopherin (importin) alpha 6                                                                |
| 327 | 10498345 | 6.35070375 | 0.000814008 | 0.0439595 | 1.154839  | Gpr171        | G protein-coupled receptor 171                                                                |
| 328 | 10495854 | -6.3489198 | 0.000814811 | 0.0439595 | 0.2955719 | Prss12        | protease, serine 12 neurotrypsin (motopsin)                                                   |
| 329 | 10478778 | 6.32527887 | 0.000831686 | 0.0442161 | 1.6382598 | Arfgef2       | ADP-ribosylation factor guanine nucleotide-exchange factor 2 (brefeldin A-inhibited)          |
| 330 | 10454369 | -6.3247996 | 0.00083249  | 0.0442161 | 0.508323  | Fhod3         | formin homolog 2 domain containing 3                                                          |
| 331 | 10373313 | -6.3276709 | 0.000829275 | 0.0442161 | 0.5027652 | Nab2          | Ngfi-A binding protein 2                                                                      |
| 332 | 10383210 | 6.32691577 | 0.000830079 | 0.0442161 | 2.4807145 | Rnf213        | ring finger protein 213                                                                       |
| 333 | 10516551 | 6.3230684  | 0.000833293 | 0.0442161 | 1.3391554 | S100pbp       | S100P binding protein                                                                         |
| 334 | 10394082 | 6.30773788 | 0.000843739 | 0.0443244 | 1.4877081 | Ogofod3       | 2-oxoglutarate and iron-dependent oxygenase domain containing 3                               |
| 335 | 10507190 | 6.28709828 | 0.000854186 | 0.0443244 | 1.6198813 | Efcab14       | EF-hand calcium binding domain 14                                                             |
| 336 | 10587284 | -6.296517  | 0.000850972 | 0.0443244 | 0.4961895 | Elovl5        | ELOVL family member 5, elongation of long chain fatty acids (yeast)                           |
| 337 | 10495685 | -6.3009038 | 0.000848561 | 0.0443244 | 0.6847547 | Arhgap29      | Rho GTPase activating protein 29                                                              |
| 338 | 10490225 | 6.28671352 | 0.000854989 | 0.0443244 | 1.5063731 | Slimo2        | slowmo homolog 2 (Drosophila)                                                                 |
| 339 | 10443080 | -6.28985   | 0.000853382 | 0.0443244 | 0.7975485 | Synqap1       | synaptic Ras GTPase activating protein 1 homolog (rat)                                        |
| 340 | 10519007 | 6.30193121 | 0.000846954 | 0.0443244 | 1.7072276 | Tprl1         | transformation related protein 63 regulated like                                              |
| 341 | 10457489 | -6.316974  | 0.000837311 | 0.0443244 | 0.8651114 | Tmem241       | transmembrane protein 241                                                                     |
| 342 | 10348889 | -6.277925  | 0.000862221 | 0.0443932 | 0.7371807 | D2hgdh        | D-2-hydroxyglutarate dehydrogenase                                                            |
| 343 | 10516994 | 6.28016431 | 0.000861418 | 0.0443932 | 1.3651175 | Fam76a        | family with sequence similarity 76, member A                                                  |
| 344 | 10514884 | 6.28251606 | 0.000860614 | 0.0443932 | 1.527638  | Mrpl37        | mitochondrial ribosomal protein L37                                                           |
| 345 | 10524588 | 6.27061059 | 0.000867043 | 0.0444014 | 1.3439753 | Ankrd13a      | ankyrin repeat domain 13a                                                                     |
| 346 | 10508711 | 6.26128016 | 0.000872668 | 0.0444239 | 1.4616923 | Taf12         | TAF12 RNA polymerase II, TATA box binding protein (TBP)-associated factor                     |
| 347 | 10460485 | 6.25009436 | 0.0008799   | 0.0446912 | 1.1622471 | Zdhhc24       | zinc finger, DHHC domain containing 24                                                        |
| 348 | 10514054 | 6.24137806 | 0.000885525 | 0.0448758 | 1.184074  | Nfib          | nuclear factor I/B                                                                            |
| 349 | 10488697 | 6.22646684 | 0.000899989 | 0.0452025 | 1.1698725 | Plagl2        | pleiomorphic adenoma gene-like 2                                                              |
| 350 | 10515739 | 6.22893858 | 0.000898382 | 0.0452025 | 1.3381465 | Szt2          | seizure threshold 2                                                                           |
| 351 | 10509246 | 6.22492771 | 0.000902399 | 0.0452228 | 1.5077833 | Luzp1         | leucine zipper protein 1                                                                      |
| 352 | 10372488 | 6.21965366 | 0.000907221 | 0.0453637 | 1.1967262 | Tmem19        | transmembrane protein 19                                                                      |
| 353 | 10543551 | 6.20761498 | 0.000916884 | 0.0456434 | 1.1236161 | Rbm28         | RNA binding motif protein 28                                                                  |
| 354 | 10450145 | 6.20183546 | 0.000919274 | 0.0456626 | 3.4009238 | Psmb9         | proteasome (prosome, macropain) subunit, beta type 9 (large multifunctional peptidase 2)      |
| 355 | 10518473 | 6.19545223 | 0.000923292 | 0.0457614 | 1.4565667 | Fbxo6         | F-box protein 6                                                                               |
| 356 | 10542317 | -6.1799948 | 0.000934542 | 0.0459127 | 0.593599  | Cdkn1b        | cyclin-dependent kinase inhibitor 1B                                                          |
| 357 | 10471770 | -6.1793264 | 0.000936953 | 0.0459127 | 0.9562617 | Olfir357      | olfactory receptor 357                                                                        |
| 358 | 10574872 | -6.1818048 | 0.000930524 | 0.0459127 | 0.8969244 | 4933405L10Rik | RIKEN cDNA 4933405L10 gene                                                                    |
| 359 | 10531199 | -6.1748807 | 0.000941774 | 0.0459702 | 0.5790358 | D130050E23Rik | RIKEN cDNA D130050E23 gene                                                                    |
| 360 | 10543306 | -6.1716344 | 0.000944185 | 0.0459883 | 0.529348  | Tspan12       | tetraspanin 12                                                                                |
| 361 | 10573128 | 6.16235219 | 0.000948202 | 0.0460845 | 1.9519451 | Tbc1d9        | TBC1 domain family, member 9                                                                  |
| 362 | 10578904 | -6.1551994 | 0.000953827 | 0.0461552 | 0.1094794 | Cpe           | carboxypeptidase E                                                                            |
| 363 | 10480652 | 6.14513589 | 0.000957845 | 0.0461552 | 1.4060127 | Ndor1         | NADPH dependent diflavin oxidoreductase 1                                                     |
| 364 | 10507894 | 6.15086711 | 0.000955434 | 0.0461552 | 1.6360037 | Rragc         | Ras-related GTP binding C                                                                     |
| 365 | 10509858 | 6.15000591 | 0.000956238 | 0.0461552 | 1.7201131 | Sdhb          | succinate dehydrogenase complex, subunit B, iron sulfur (lp)                                  |
| 366 | 10415411 | -6.1429868 | 0.000961059 | 0.0462114 | 0.3193604 | Nynrin        | NYN domain and retroviral integrase containing                                                |
| 367 | 10505326 | 6.1306699  | 0.000971506 | 0.0463101 | 1.2415719 | Rgs3          | regulator of G-protein signaling 3                                                            |
| 368 | 10517116 | 6.12571014 | 0.000977934 | 0.0463101 | 1.96199   | Rps6ka1       | ribosomal protein S6 kinase polypeptide 1                                                     |
| 369 | 10410078 | 6.13041409 | 0.000972309 | 0.0463101 | 1.2597174 | Slc35d2       | solute carrier family 35, member D2                                                           |
| 370 | 10510391 | 6.13478113 | 0.000967488 | 0.0463101 | 1.7102531 | Srm           | spermidine synthase                                                                           |
| 371 | 10444244 | 6.12267305 | 0.000978738 | 0.0463101 | 3.573465  | Tap1          | transporter 1, ATP-binding cassette, sub-family B (MDR/TAP)                                   |
| 372 | 10607346 | -6.1345311 | 0.000968291 | 0.0463101 | 0.7040215 | Tspyl2        | TSPY-like 2                                                                                   |
| 373 | 10493565 | 6.09883174 | 0.000996416 | 0.0464266 | 1.6832344 | Adar          | adenosine deaminase, RNA-specific                                                             |
| 374 | 10505749 | 6.10862152 | 0.000988381 | 0.0464266 | 1.5055685 | Dennd4c       | DENN/MADD domain containing 4C                                                                |
| 375 | 10514255 | 6.10052879 | 0.000994005 | 0.0464266 | 1.7535813 | Mllt3         | myeloid/lymphoid or mixed-lineage leukemia (trithorax homolog, Drosophila)                    |
| 376 | 10441902 | 6.1019919  | 0.000992398 | 0.0464266 | 2.1850513 | Smoc2         | SPARC related modular calcium binding 2                                                       |
| 377 | 10425335 | -6.1145977 | 0.000985166 | 0.0464266 | 0.5818045 | Synqr1        | synaptogyrin 1                                                                                |
| 378 | 10383436 | 6.08680422 | 0.01004452  | 0.0466289 | 1.1934763 | Aspscr1       | alveolar soft part sarcoma chromosome region, candidate 1 (human)                             |
| 379 | 10376959 | 6.06128469 | 0.01024541  | 0.0466289 | 1.2215317 | Ela2c         | elaC homolog 2 (E. coli)                                                                      |
| 380 | 10509463 | 6.080519   | 0.01010077  | 0.0466289 | 1.7890638 | Eif4g3        | eukaryotic translation initiation factor 4 gamma, 3                                           |
| 381 | 10510708 | 6.06012635 | 0.01026148  | 0.0466289 | 1.4460316 | lcm1          | isoprenylcysteine carboxyl methyltransferase                                                  |
| 382 | 10517263 | 6.06664741 | 0.01012213  | 0.0466289 | 1.5641282 | Mtfr1l        | mitochondrial fission regulator 1-like                                                        |
| 383 | 10567851 | 6.05787685 | 0.01030969  | 0.0466289 | 1.2815409 | Nfatc2ip      | nuclear factor of activated T cells, cytoplasmic, calcineurin dependent 2 interacting protein |
| 384 | 10515974 | 6.0743409  | 0.01015702  | 0.0466289 | 1.5401294 | Nfyc          | nuclear transcription factor-Y gamma                                                          |
| 385 | 10476702 | 6.08395448 | 0.01007666  | 0.0466289 | 1.3745998 | Sec23b        | SEC23B (S. cerevisiae)                                                                        |

|     |          |            |             |           |           |               |                                                                                      |
|-----|----------|------------|-------------|-----------|-----------|---------------|--------------------------------------------------------------------------------------|
| 386 | 10519105 | 6.06000524 | 0.001026951 | 0.0466289 | 1.5030805 | Ski           | ski sarcoma viral oncogene homolog (avian)                                           |
| 387 | 10537428 | 6.0553809  | 0.001034184 | 0.0466444 | 1.3799677 | Rab19         | RAB19, member RAS oncogene family                                                    |
| 388 | 10416566 | 6.04812321 | 0.001040612 | 0.0468195 | 2.2998566 | Eps11         | epithelial stromal interaction 1 (breast)                                            |
| 389 | 10505172 | 6.01061969 | 0.00106954  | 0.0472932 | 1.5916766 | Dnaic25       | DnaJ (Hsp40) homolog, subfamily C, member 25                                         |
| 390 | 10506170 | 6.01937985 | 0.001062308 | 0.0472932 | 1.472593  | Efcab7        | EF-hand calcium binding domain 7                                                     |
| 391 | 10507784 | 6.01320349 | 0.001068737 | 0.0472932 | 1.3837923 | Ppt1          | palmitoyl-protein thioesterase 1                                                     |
| 392 | 10514405 | 6.01891334 | 0.001063915 | 0.0472932 | 1.7995666 | Pla2          | phospholipase A2, activating protein                                                 |
| 393 | 10452639 | 6.00366553 | 0.001076772 | 0.0473618 | 1.1987415 | My12b         | myosin, light chain 12B, regulatory                                                  |
| 394 | 10505000 | 6.00058455 | 0.001081594 | 0.0473618 | 1.612446  | Nipsnap3b     | nipsnap homolog 3B (C. elegans)                                                      |
| 395 | 10515688 | 6.00540222 | 0.001075165 | 0.0473618 | 1.3680778 | Szt2          | seizure threshold 2                                                                  |
| 396 | 10404380 | 5.99178633 | 0.001091236 | 0.0474904 | 1.2519093 | Dusp22        | dual specificity phosphatase 22                                                      |
| 397 | 10477966 | 5.98833051 | 0.001097665 | 0.0474904 | 1.2009092 | Manbal        | mannosidase, beta A, lysosomal-like                                                  |
| 398 | 10511007 | 5.99173464 | 0.001092004 | 0.0474904 | 1.3885787 | 2610002J02Rik | RIKEN cDNA 2610002J02 gene                                                           |
| 399 | 10541089 | 5.98601433 | 0.001099272 | 0.0474904 | 1.4062414 | 2900097C17Rik | RIKEN cDNA 2900097C17 gene                                                           |
| 400 | 10368101 | 5.97459633 | 0.001109718 | 0.0475558 | 1.4275995 | Arfgef3       | ARFGEF family member 3                                                               |
| 401 | 10518069 | 5.96239485 | 0.00111282  | 0.0475558 | 1.6402824 | Efh2d         | EF hand domain containing 2                                                          |
| 402 | 10383409 | 5.9729575  | 0.001110522 | 0.0475558 | 1.1730418 | Gcgr          | glucagon receptor                                                                    |
| 403 | 10506058 | 5.9646664  | 0.001123379 | 0.0475558 | 1.4422431 | Inadl         | InaD-like (Drosophila)                                                               |
| 404 | 10507933 | 5.97035264 | 0.001115343 | 0.0475558 | 1.5747587 | Inpp5b        | inositol polyphosphate-5-phosphatase B                                               |
| 405 | 10508036 | 5.96357105 | 0.001125789 | 0.0475558 | 1.3146205 | Snip1         | Smad nuclear interacting protein 1                                                   |
| 406 | 10518774 | 5.9530116  | 0.001133825 | 0.0476149 | 1.3869134 | Park7         | Parkinson disease (autosomal recessive, early onset) 7                               |
| 407 | 10383208 | 5.95828267 | 0.001132218 | 0.0476149 | 2.4464676 | Rnf213        | ring finger protein 213                                                              |
| 408 | 10513082 | 5.9488473  | 0.00113945  | 0.0477622 | 1.266881  | Tmem245       | transmembrane protein 245                                                            |
| 409 | 10516371 | 5.93122469 | 0.001157932 | 0.0479702 | 1.5568556 | 37104         | argonaute RISC catalytic subunit 1                                                   |
| 410 | 10515712 | 5.92480874 | 0.001161146 | 0.0479702 | 1.6311245 | Szt2          | seizure threshold 2                                                                  |
| 411 | 10346191 | 5.92273693 | 0.001162753 | 0.0479702 | 2.6232112 | Stat1         | signal transducer and activator of transcription 1                                   |
| 412 | 10515994 | 5.93270396 | 0.001157128 | 0.0479702 | 1.4199182 | Smap2         | small ArfGAP 2                                                                       |
| 413 | 10515385 | 5.92945374 | 0.001159539 | 0.0479702 | 1.5940317 | Urod          | uroporphyrinogen decarboxylase                                                       |
| 414 | 10514319 | 5.91102846 | 0.00111732  | 0.0480167 | 1.2212035 | Kihl9         | kelch-like 9                                                                         |
| 415 | 10373628 | 5.91430714 | 0.001169985 | 0.0480167 | 1.0703475 | Olfir798      | olfactory receptor 798                                                               |
| 416 | 10371230 | 5.91010328 | 0.00117561  | 0.0480281 | 1.3090912 | Gna11         | guanine nucleotide binding protein, alpha 11                                         |
| 417 | 10358637 | 5.89951542 | 0.001181235 | 0.0481707 | 1.1971166 | Hmcn1         | hemicentin 1                                                                         |
| 418 | 10409294 | 5.89775953 | 0.001183646 | 0.0481819 | 1.1872077 | Splt1c        | serine palmitoyltransferase, long chain base subunit 1                               |
| 419 | 10481772 | 5.87963195 | 0.001204539 | 0.0483236 | 2.0915407 | Garnl3        | GTPase activating RANGAP domain-like 3                                               |
| 420 | 10557211 | 5.88426275 | 0.001202128 | 0.0483236 | 1.4777988 | Rbbp6         | retinoblastoma binding protein 6                                                     |
| 421 | 10537353 | 5.87252662 | 0.001208556 | 0.0483236 | 1.354359  | Ttc26         | tetratricopeptide repeat domain 26                                                   |
| 422 | 10514128 | 5.89206031 | 0.001190878 | 0.0483236 | 2.7456033 | Ttc39b        | tetratricopeptide repeat domain 39B                                                  |
| 423 | 10526145 | 5.8830199  | 0.001202931 | 0.0483236 | 1.3469321 | Tmem248       | transmembrane protein 248                                                            |
| 424 | 10510844 | 5.86656268 | 0.001212574 | 0.048377  | 1.520791  | Wrap73        | WD repeat containing, antisense to Trp73                                             |
| 425 | 10480999 | 5.85253344 | 0.001225431 | 0.0484611 | 1.3708282 | Sdcccag3      | serologically defined colon cancer antigen 3                                         |
| 426 | 10480672 | 5.85232717 | 0.001226235 | 0.0484611 | 1.3719298 | Ssna1         | Sjogren's syndrome nuclear autoantigen 1                                             |
| 427 | 10478590 | 5.85071102 | 0.001227038 | 0.0484611 | 1.6150578 | Zswim1        | zinc finger SWIM-type containing 1                                                   |
| 428 | 10505791 | 5.8426529  | 0.001238288 | 0.0485967 | 1.6043358 | Focad         | focadhesin                                                                           |
| 429 | 10383245 | 5.84600198 | 0.001235074 | 0.0485967 | 1.1386606 | Rptor         | regulatory associated protein of MTOR, complex 1                                     |
| 430 | 10515326 | 5.84234358 | 0.001239092 | 0.0485967 | 1.3867849 | Tmem69        | transmembrane protein 69                                                             |
| 431 | 10472589 | 5.83873694 | 0.001243913 | 0.0486167 | 1.3387224 | Phospho2      | phosphatase, orphan 2                                                                |
| 432 | 10478772 | 5.82855404 | 0.001255966 | 0.0488218 | 1.5570774 | Arfgef2       | ADP-ribosylation factor guanine nucleotide-exchange factor 2 (brefeldin A-inhibited) |
| 433 | 10393955 | 5.79626774 | 0.001284895 | 0.0490432 | 1.2661866 | Dus1l         | dihydrouridine synthase 1-like (S. cerevisiae)                                       |
| 434 | 10558274 | 5.80339523 | 0.001282484 | 0.0490432 | 1.1115731 | Fam175b       | family with sequence similarity 175, member B                                        |
| 435 | 10564960 | 5.80464744 | 0.00128168  | 0.0490432 | 1.4468807 | Furin         | furin (paired basic amino acid cleaving enzyme)                                      |
| 436 | 10438445 | 5.79046434 | 0.001289716 | 0.0490432 | 1.5131423 | Kihl6         | kelch-like 6                                                                         |
| 437 | 10515702 | 5.80194894 | 0.001283288 | 0.0490432 | 1.5431545 | Szt2          | seizure threshold 2                                                                  |
| 438 | 10586242 | 5.77993247 | 0.001300162 | 0.049061  | 1.2454296 | Dennd4a       | DENN/MADD domain containing 4A                                                       |
| 439 | 10568988 | 5.72180526 | 0.00136284  | 0.0495163 | 1.223585  | Bet1l         | blocked early in transport 1 homolog (S. cerevisiae)-like                            |
| 440 | 10510034 | 5.71428829 | 0.001369269 | 0.0495163 | 1.2838341 | Casp9         | caspase 9                                                                            |
| 441 | 10506843 | 5.75941423 | 0.001323466 | 0.0495163 | 1.7158711 | Cc2d1b        | coiled-coil and C2 domain containing 1B                                              |
| 442 | 10439268 | 5.72549067 | 0.001355608 | 0.0495163 | 1.8475301 | Dtx3l         | deltex 3-like (Drosophila)                                                           |
| 443 | 10509147 | 5.74657539 | 0.001334715 | 0.0495163 | 1.7854643 | Gale          | galactose-4-epimerase, UDP                                                           |
| 444 | 10369774 | 5.70603657 | 0.001378911 | 0.0495163 | 1.305451  | Nrbf2         | nuclear receptor binding factor 2                                                    |
| 445 | 10521337 | 5.74264928 | 0.001337993 | 0.0495163 | 1.4410252 | Rgs12         | regulator of G-protein signaling 12                                                  |
| 446 | 10515690 | 5.73225486 | 0.001349983 | 0.0495163 | 1.4282895 | Szt2          | seizure threshold 2                                                                  |
| 447 | 10515710 | 5.72783411 | 0.001354804 | 0.0495163 | 1.3406504 | Szt2          | seizure threshold 2                                                                  |
| 448 | 10476033 | 5.73792319 | 0.001343555 | 0.0495163 | 1.3623079 | Stk35         | serine/threonine kinase 35                                                           |
| 449 | 10600301 | 5.73112749 | 0.00135159  | 0.0495163 | 1.1834382 | Ssr4          | signal sequence receptor, delta                                                      |
| 450 | 10508269 | 5.74820091 | 0.001333108 | 0.0495163 | 1.3099763 | Smim12        | small integral membrane protein 12                                                   |
| 451 | 10584034 | 5.74329499 | 0.001337126 | 0.0495163 | 1.2787461 | Snx19         | sorting nexin 19                                                                     |
| 452 | 10357917 | 5.72254124 | 0.001361233 | 0.0495163 | 1.1714838 | Tmem183a      | transmembrane protein 183A                                                           |
| 453 | 10395039 | 5.69768869 | 0.001390161 | 0.0496691 | 4.138261  | Cmpk2         | cytidine monophosphate (UMP-CMP) kinase 2, mitochondrial                             |
| 454 | 10458355 | 5.68529853 | 0.00140784  | 0.0498267 | 1.2376704 | Apbb3         | amyloid beta (A4) precursor protein-binding, family B, member 3                      |
| 455 | 10518031 | 5.66797534 | 0.001426321 | 0.0498267 | 1.6140621 | Dnajc16       | DnaJ (Hsp40) homolog, subfamily C, member 16                                         |
| 456 | 10381408 | 5.66739083 | 0.001427929 | 0.0498267 | 1.7740171 | Ilf35         | Interferon-induced protein 35                                                        |
| 457 | 10419731 | 5.66949163 | 0.001423911 | 0.0498267 | 1.3441224 | Nrbf2         | nuclear receptor binding factor 2                                                    |
| 458 | 10419729 | 5.66949163 | 0.001423911 | 0.0498267 | 1.3441224 | Nrbf2         | nuclear receptor binding factor 2                                                    |
| 459 | 10482139 | 5.68414181 | 0.00141025  | 0.0498267 | 1.3409772 | Pdcl          | phosducin-like                                                                       |
| 460 | 10550131 | 5.68591085 | 0.001404625 | 0.0498267 | 1.5579329 | Pla2g4c       | phospholipase A2, group IVC (cytosolic, calcium-independent)                         |
| 461 | 10482509 | 5.67454814 | 0.001419893 | 0.0498267 | 1.6885293 | Rbm43         | RNA binding motif protein 43                                                         |
| 462 | 10489850 | 5.68724126 | 0.001402215 | 0.0498267 | 2.5308649 | Znfx1         | zinc finger, NFX1-type containing 1                                                  |
| 463 | 10365005 | 5.65785007 | 0.001439982 | 0.0499592 | 1.1019858 | Dapk3         | death-associated protein kinase 3                                                    |
| 464 | 10490370 | 5.65898513 | 0.001438375 | 0.0499592 | 1.3147786 | Psm2          | proteasome (prosome, macropain) subunit, alpha type 7                                |
| 465 | 10515708 | 5.65406938 | 0.001445607 | 0.0500561 | 1.2891417 | Szt2          | seizure threshold 2                                                                  |
| 466 | 10348194 | 5.64520452 | 0.001452839 | 0.0501247 | 6.3515983 | Efh1d         | EF hand domain containing 1                                                          |
| 467 | 10506118 | 5.63928674 | 0.001456857 | 0.0501588 | 1.4710122 | Usp1          | ubiquitin specific peptidase 1                                                       |
| 468 | 10481056 | 5.63683859 | 0.001461678 | 0.0501992 | 1.9440074 | Notch1        | notch 1                                                                              |
| 469 | 10560122 | 5.61634463 | 0.001490606 | 0.0507781 | 1.1011598 | Sult2a6       | sulfotransferase family 2A, dehydroepiandrosterone (DHEA)-preferring, member 6       |
| 470 | 10477637 | 5.61310858 | 0.001493821 | 0.0507889 | 2.2696384 | Map1lc3a      | microtubule-associated protein 1 light chain 3 alpha                                 |
| 471 | 10463557 | 5.60482768 | 0.001500249 | 0.0508593 | 1.2673692 | Gbf1          | golgi-specific brefeldin A-resistance factor 1                                       |
| 472 | 10514779 | 5.60022089 | 0.001504267 | 0.0508593 | 1.5451578 | Prkaa2        | protein kinase, AMP-activated, alpha 2 catalytic subunit                             |
| 473 | 10457780 | 5.59784767 | 0.001506678 | 0.0508646 | 2.1694978 | Garem         | GRB2 associated, regulator of MAPK1                                                  |
| 474 | 10442629 | 5.59561019 | 0.001509992 | 0.0508969 | 1.2525219 | Spsb3         | spiA/ryanodine receptor domain and SOCS box containing 3                             |
| 475 | 10379636 | 5.59220681 | 0.001512303 | 0.0509021 | 1.5632322 | Slnf4         | schlafen 4                                                                           |
| 476 | 10451993 | 5.58920289 | 0.001521142 | 0.0510472 | 1.2336185 | Mvdgf         | myeloid derived growth factor                                                        |
| 477 | 10579532 | 5.58778636 | 0.001525963 | 0.0511329 | 2.9551101 | Bst2          | bone marrow stromal cell antigen 2                                                   |
| 478 | 10392056 | 5.58256477 | 0.001536409 | 0.0512545 | 1.4003265 | Cyb561        | cytochrome b-561                                                                     |
| 479 | 10544273 | 5.57331552 | 0.001549266 | 0.0513881 | 1.4270955 | Clec5a        | C-type lectin domain family 5, member a                                              |
| 480 | 10365286 | 5.57447656 | 0.001546052 | 0.0513881 | 1.3988889 | Eid3          | EP300 interacting inhibitor of differentiation 3                                     |
| 481 | 10517036 | 5.57134522 | 0.001550873 | 0.0513881 | 1.7694843 | Wdtdc1        | WD and tetratricopeptide repeats 1                                                   |
| 482 | 10468949 | 5.54402496 | 0.001585427 | 0.0517678 | 1.3027191 | Dclre1c       | DNA cross-link repair 1C, PSO2 homolog (S. cerevisiae)                               |
| 483 | 10476952 | 5.54796913 | 0.001581409 | 0.0517678 | 1.2703208 | Entpd6        | ectonucleoside triphosphate diphosphohydrolase 6                                     |

|     |          |            |             |           |           |               |                                                                                         |
|-----|----------|------------|-------------|-----------|-----------|---------------|-----------------------------------------------------------------------------------------|
| 484 | 10506939 | 5.54760413 | 0.001582212 | 0.0517678 | 1.6293374 | Eps15         | epidermal growth factor receptor pathway substrate 15                                   |
| 485 | 10572622 | 5.54918152 | 0.001578195 | 0.0517678 | 1.3035393 | Gtppb3        | GTP binding protein 3                                                                   |
| 486 | 10515277 | 5.55577401 | 0.001571766 | 0.0517678 | 1.6496421 | Lurap1        | leucine rich adaptor protein 1                                                          |
| 487 | 10478401 | 5.54384829 | 0.00158623  | 0.0517678 | 1.3095355 | Ttpal         | tocopherol (alpha) transfer protein-like                                                |
| 488 | 10481320 | 5.5408767  | 0.001592659 | 0.0519025 | 1.4672895 | Gtf3c4        | general transcription factor IIIc, polypeptide 4                                        |
| 489 | 10501164 | 5.52917609 | 0.001606319 | 0.0520308 | 1.4342469 | Csf1          | colony stimulating factor 1 (macrophage)                                                |
| 490 | 10506415 | 5.53526818 | 0.001601498 | 0.0520308 | 1.7634984 | Oma1          | OMA1 homolog, zinc metallopeptidase (S. cerevisiae)                                     |
| 491 | 10383192 | 5.53268093 | 0.001603909 | 0.0520308 | 2.2612419 | Rnf213        | ring finger protein 213                                                                 |
| 492 | 10359181 | 5.52803494 | 0.00160873  | 0.0520308 | 1.9342182 | Tor3a         | torsin family 3, member A                                                               |
| 493 | 10516778 | 5.52419973 | 0.001611944 | 0.0520308 | 1.4561535 | Zcchc17       | zinc finger, CCHC domain containing 17                                                  |
| 494 | 10505623 | 5.51598518 | 0.001629622 | 0.052054  | 1.9048283 | Lurap1l       | leucine rich adaptor protein 1-like                                                     |
| 495 | 10379262 | 5.51674585 | 0.001628819 | 0.052054  | 1.4752164 | NF1           | neurofibromatosis 1                                                                     |
| 496 | 10489368 | 5.51240592 | 0.001639265 | 0.0522141 | 1.7976796 | Fitm2         | fat storage-inducing transmembrane protein 2                                            |
| 497 | 10516051 | 5.4874684  | 0.001680247 | 0.052774  | 1.4715536 | Cap1          | CAP, adenylate cyclase-associated protein 1 (yeast)                                     |
| 498 | 10509930 | 5.4875325  | 0.001679443 | 0.052774  | 1.5853739 | Fbxo42        | F-box protein 42                                                                        |
| 499 | 10479335 | 5.48956546 | 0.001675425 | 0.052774  | 1.3506545 | Osbpl2        | oxysterol binding protein-like 2                                                        |
| 500 | 10485342 | 5.48958681 | 0.001674622 | 0.052774  | 1.2104517 | Ttc17         | tetratricopeptide repeat domain 17                                                      |
| 501 | 10515368 | 5.48426551 | 0.001686675 | 0.0529023 | 1.3904422 | Toe1          | target of EGR1, member 1 (nuclear)                                                      |
| 502 | 10514590 | 5.47794434 | 0.001701943 | 0.0531359 | 1.3291383 | Dock7         | dedicator of cytokinesis 7                                                              |
| 503 | 10434778 | 5.471824   | 0.001713193 | 0.0533157 | 2.243513  | Rtp4          | receptor transporter protein 4                                                          |
| 504 | 10489904 | 5.47093673 | 0.00171148  | 0.0533157 | 1.3627393 | Spat2         | spermatogenesis associated 2                                                            |
| 505 | 10496580 | 5.46615804 | 0.001722032 | 0.0533435 | 3.0231481 | Gbp3          | guanylate binding protein 3                                                             |
| 506 | 10382470 | 5.46417248 | 0.00172605  | 0.0533463 | 1.1652357 | Tmem104       | transmembrane protein 104                                                               |
| 507 | 10478077 | 5.45842168 | 0.001731675 | 0.0533491 | 1.3641267 | Ralgapb       | Ral GTPase activating protein, beta subunit (non-catalytic)                             |
| 508 | 10467149 | 5.45443785 | 0.001736496 | 0.0533779 | 1.5721743 | 2010002M12Rik | RIKEN cDNA 2010002M12 gene                                                              |
| 509 | 10378068 | 5.45189674 | 0.00173971  | 0.0533779 | 2.4215605 | Xaf1          | XIAP associated factor 1                                                                |
| 510 | 10462621 | 5.44188711 | 0.001747746 | 0.0535516 | 5.3900886 | 1830012O16Rik | RIKEN cDNA 1830012O16 gene                                                              |
| 511 | 10486166 | 5.42976612 | 0.001772656 | 0.053611  | 1.4042136 | Ccdc32        | coiled-coil domain containing 32                                                        |
| 512 | 10537426 | 5.43163075 | 0.001767031 | 0.053611  | 1.4065218 | 4930599N23Rik | RIKEN cDNA 4930599N23 gene                                                              |
| 513 | 10360589 | 5.42654549 | 0.001775871 | 0.053612  | 1.1384724 | Ahctf1        | AT hook containing transcription factor 1                                               |
| 514 | 10507931 | 5.42424849 | 0.001778281 | 0.053613  | 1.1636318 | Mir697        | microRNA 697                                                                            |
| 515 | 10379530 | 5.40543443 | 0.001806406 | 0.0536506 | 1.5547047 | Ccl12         | chemokine (C-C motif) ligand 12                                                         |
| 516 | 10577838 | 5.40327427 | 0.00180962  | 0.0536506 | 2.1007332 | Ddhd2         | DDHD domain containing 2                                                                |
| 517 | 10468992 | 5.40305833 | 0.001810424 | 0.0536506 | 1.5677801 | Frdm4a        | FERM domain containing 4A                                                               |
| 518 | 10516706 | 5.40234167 | 0.001812031 | 0.0536506 | 1.3156838 | Khdrbs1       | KH domain containing, RNA binding, signal transduction associated 1                     |
| 519 | 10510286 | 5.41466598 | 0.001792745 | 0.0536506 | 1.5849387 | Mad2l2        | MAD2 mitotic arrest deficient-like 2                                                    |
| 520 | 10518385 | 5.41184135 | 0.00179837  | 0.0536506 | 1.6001748 | Mfn2          | mitofusin 2                                                                             |
| 521 | 10500911 | 5.40918638 | 0.001802388 | 0.0536506 | 1.5862113 | Mov10         | Moloney leukemia virus 10                                                               |
| 522 | 10550237 | 5.41404851 | 0.001793549 | 0.0536506 | 1.1451498 | Napa          | N-ethylmaleimide sensitive fusion protein attachment protein alpha                      |
| 523 | 10394627 | 5.40077717 | 0.001812834 | 0.0536506 | 1.3618954 | Nbas          | neuroblastoma amplified sequence                                                        |
| 524 | 10513381 | 5.41348585 | 0.001795156 | 0.0536506 | 1.3876838 | Ptbp3         | polypyrimidine tract binding protein 3                                                  |
| 525 | 10464924 | 5.40554459 | 0.001805602 | 0.0536506 | 1.1641486 | Rab1b         | RAB1B, member RAS oncogene family                                                       |
| 526 | 10566067 | 5.41491367 | 0.001791942 | 0.0536506 | 1.1450048 | Rnf121        | ring finger protein 121                                                                 |
| 527 | 10502791 | 5.39375278 | 0.001820067 | 0.0537236 | 3.3360021 | Ifi44         | interferon-induced protein 44                                                           |
| 528 | 10540860 | 5.37821936 | 0.00184578  | 0.0540816 | 1.1464509 | Atg7          | autophagy related 7                                                                     |
| 529 | 10508151 | 5.38376239 | 0.001840156 | 0.0540816 | 1.3263543 | Cispn         | claspin                                                                                 |
| 530 | 10462623 | 5.38441467 | 0.001837745 | 0.0540816 | 4.4430261 | Ifit1         | interferon-induced protein with tetratricopeptide repeats 1                             |
| 531 | 10515613 | 5.38056055 | 0.00184337  | 0.0540816 | 1.6118892 | Ptprf         | protein tyrosine phosphatase, receptor type, F                                          |
| 532 | 10515046 | 5.36348654 | 0.00186587  | 0.0542239 | 1.3530138 | Btf3l4        | basic transcription factor 3-like 4                                                     |
| 533 | 10403273 | 5.35725956 | 0.00187827  | 0.0544572 | 1.4509987 | Asb13         | ankyrin repeat and SOCS box-containing 13                                               |
| 534 | 10508042 | 5.33640593 | 0.001925333 | 0.0551689 | 1.3258168 | Meaf6         | MYST/Esa1-associated factor 6                                                           |
| 535 | 10518679 | 5.34023511 | 0.001916494 | 0.0551689 | 1.5874401 | Nmnat1        | nicotinamide nucleotide adenyltransferase 1                                             |
| 536 | 10349724 | 5.3352884  | 0.001927744 | 0.0551689 | 1.9515165 | Rab29         | RAB29, member RAS oncogene family                                                       |
| 537 | 10515844 | 5.33693213 | 0.001923726 | 0.0551689 | 1.4547014 | Zfp691        | zinc finger protein 691                                                                 |
| 538 | 10410173 | 5.32718826 | 0.001940601 | 0.0552564 | 1.2269215 | Hiatl1        | hippocampus abundant transcript-like 1                                                  |
| 539 | 10444991 | 5.32578904 | 0.001945422 | 0.0553238 | 1.3520879 | Gm6034        | predicted gene 6034                                                                     |
| 540 | 10481870 | 5.32221857 | 0.001953458 | 0.0554824 | 1.3558359 | Gapvd1        | GTPase activating protein and VPS9 domains 1                                            |
| 541 | 10481654 | 5.31749557 | 0.0019631   | 0.0555464 | 1.4549995 | Fpgs          | folylpolyglutamyl synthetase                                                            |
| 542 | 10510422 | 5.31221263 | 0.001971136 | 0.0556341 | 1.7810604 | Cas2l         | castor zinc finger 1                                                                    |
| 543 | 10500406 | 5.30975434 | 0.00197435  | 0.0556552 | 1.1425616 | Cd160         | CD160 antigen                                                                           |
| 544 | 10348424 | 5.29947435 | 0.001983189 | 0.055765  | 1.176968  | Sh3bp4        | SH3-domain binding protein 4                                                            |
| 545 | 10505747 | 5.29372952 | 0.00199685  | 0.055891  | 1.6724243 | Rraga         | Ras-related GTP binding A                                                               |
| 546 | 10379633 | 5.29394774 | 0.001996046 | 0.055891  | 1.8289296 | Sifn1         | schlafen 1                                                                              |
| 547 | 10454580 | 5.28655273 | 0.002008903 | 0.0559262 | 1.2785407 | Bin1          | bridging integrator 1                                                                   |
| 548 | 10498367 | 5.28845104 | 0.002004886 | 0.0559262 | 1.7369804 | P2ry13        | purinergic receptor P2Y, G-protein coupled 13                                           |
| 549 | 10448676 | 5.2850585  | 0.002011314 | 0.0559262 | 1.3783356 | Slc9a3r2      | solute carrier family 9 (sodium/hydrogen exchanger), member 3 regulator 2               |
| 550 | 10460085 | 5.27837729 | 0.002028189 | 0.0561651 | 1.3420549 | Cndp2         | CNDP dipeptidase 2 (metallopeptidase M20 family)                                        |
| 551 | 10393926 | 5.27060193 | 0.002038635 | 0.0561938 | 1.2163763 | Dcxr          | dicarbonyl L-xylulose reductase                                                         |
| 552 | 10505587 | 5.26508903 | 0.002048278 | 0.0561938 | 1.3620205 | Kdm4c         | lysine (K)-specific demethylase 4C                                                      |
| 553 | 10363379 | 5.26920697 | 0.002041849 | 0.0561938 | 1.2446471 | Micu1         | mitochondrial calcium uptake 1                                                          |
| 554 | 10517436 | 5.26573911 | 0.002045867 | 0.0561938 | 1.4825182 | Plthd1        | PITH (C-terminal proteasome-interacting domain of thioredoxin-like) domain containing 1 |
| 555 | 10515481 | 5.25465872 | 0.002065956 | 0.0562221 | 1.2948746 | Dmap1         | DNA methyltransferase 1-associated protein 1                                            |
| 556 | 10574098 | 5.25592015 | 0.002061939 | 0.0562221 | 5.2910015 | Nlr5          | NLR family, CARD domain containing 5                                                    |
| 557 | 10435457 | 5.25568202 | 0.002062742 | 0.0562221 | 1.7084558 | Parp9         | poly (ADP-ribose) polymerase family, member 9                                           |
| 558 | 10471519 | 5.25996307 | 0.002056314 | 0.0562221 | 1.5835265 | Tor2a         | torsin family 2, member A                                                               |
| 559 | 10533304 | 5.2418769  | 0.002087652 | 0.0565177 | 1.8322372 | Trafd1        | TRAF type zinc finger domain containing 1                                               |
| 560 | 10388861 | 5.23085993 | 0.002104527 | 0.0567456 | 1.3630948 | Tmem199       | transmembrane protein 199                                                               |
| 561 | 10450325 | 5.22071823 | 0.00212542  | 0.0569498 | 3.852683  | Cfb           | complement factor B                                                                     |
| 562 | 10475630 | 5.21134723 | 0.002140688 | 0.0569498 | 1.240071  | Galk2         | galactokinase 2                                                                         |
| 563 | 10574151 | 5.21415091 | 0.002133455 | 0.0569498 | 3.5663089 | Nlr5          | NLR family, CARD domain containing 5                                                    |
| 564 | 10353524 | 5.21100863 | 0.002141491 | 0.0569498 | 1.8990569 | Ogfr1l        | opioid growth factor receptor-like 1                                                    |
| 565 | 10516974 | 5.21182401 | 0.002139884 | 0.0569498 | 1.5708193 | Ppp1r8        | protein phosphatase 1, regulatory (inhibitor) subunit 8                                 |
| 566 | 10509127 | 5.20322787 | 0.002159169 | 0.0570495 | 1.4148013 | Fuca1         | fucosidase, alpha-L-1, tissue                                                           |
| 567 | 10476189 | 5.19882584 | 0.002168009 | 0.0570495 | 1.373142  | Mrps26        | mitochondrial ribosomal protein S26                                                     |
| 568 | 10508649 | 5.20131199 | 0.002163991 | 0.0570495 | 1.3309919 | Gm23711       | predicted gene, 23711                                                                   |
| 569 | 10508647 | 5.20131199 | 0.002163991 | 0.0570495 | 1.3309919 | Gm23711       | predicted gene, 23711                                                                   |
| 570 | 10508112 | 5.19913904 | 0.002166401 | 0.0570495 | 1.4157609 | Lsm10         | U7 snRNP-specific Sm-like protein LSM10                                                 |
| 571 | 10359405 | 5.19579394 | 0.002176044 | 0.0571276 | 1.1636365 | Klhl20        | kelch-like 20                                                                           |
| 572 | 10477090 | 5.18380511 | 0.002198544 | 0.0573843 | 1.4546735 | Tbc1d20       | TBC1 domain family, member 20                                                           |
| 573 | 10513551 | 5.18267422 | 0.002204169 | 0.0574646 | 1.5285438 | Fkbp15        | FK506 binding protein 15                                                                |
| 574 | 10517090 | 5.17212537 | 0.002217829 | 0.0574706 | 1.3081678 | Arid1a        | AT rich interactive domain 1A (SWI-like)                                                |
| 575 | 10517147 | 5.16594666 | 0.002229883 | 0.0574706 | 1.474239  | Dhdds         | dehydrodolichyl diphosphate synthase                                                    |
| 576 | 10439249 | 5.16894961 | 0.002224258 | 0.0574706 | 2.8031911 | Parp14        | poly (ADP-ribose) polymerase family, member 14                                          |
| 577 | 10515461 | 5.16759927 | 0.002226669 | 0.0574706 | 1.4708668 | Rnf220        | ring finger protein 220                                                                 |
| 578 | 10445758 | 5.16910815 | 0.00223454  | 0.0574706 | 1.1999262 | Trem1         | triggering receptor expressed on myeloid cells-like 4                                   |
| 579 | 10517600 | 5.15828315 | 0.002245151 | 0.0576626 | 1.836026  | Pink1         | PTEN induced putative kinase 1                                                          |
| 580 | 10354233 | 5.15773233 | 0.002247561 | 0.0576626 | 1.283994  | Tgfbra1       | transforming growth factor, beta receptor associated protein 1                          |
| 581 | 10388065 | 5.15307007 | 0.002255597 | 0.057713  | 1.0975996 | Nlrp1b        | NLR family, pyrin domain containing 1B                                                  |

|     |          |            |             |           |           |               |                                                                            |
|-----|----------|------------|-------------|-----------|-----------|---------------|----------------------------------------------------------------------------|
| 582 | 10453276 | 5.15196952 | 0.002257204 | 0.057713  | 1.1340274 | Thada         | thyroid adenoma associated                                                 |
| 583 | 10481164 | 5.14605432 | 0.002272472 | 0.0579719 | 1.9162677 | Slc2a6        | solute carrier family 2 (facilitated glucose transporter), member 6        |
| 584 | 10444821 | 5.14357012 | 0.002278097 | 0.0579802 | 2.3874011 | H2-Q5         | histocompatibility 2, Q region locus 5                                     |
| 585 | 10494335 | 5.13659796 | 0.002293364 | 0.0580167 | 1.1153593 | Otud7b        | OTU domain containing 7B                                                   |
| 586 | 10542414 | 5.13713513 | 0.00229015  | 0.0580167 | 1.2213453 | Ptpro         | protein tyrosine phosphatase, receptor type, O                             |
| 587 | 10510629 | 5.13153894 | 0.002304614 | 0.0580207 | 1.5628865 | Nol9          | nucleolar protein 9                                                        |
| 588 | 10490150 | 5.13106397 | 0.002305418 | 0.0580207 | 4.4862421 | Zbp1          | Z-DNA binding protein 1                                                    |
| 589 | 10510270 | 5.12489598 | 0.002316667 | 0.058178  | 1.696075  | Mthfr         | 5,10-methylenetetrahydrofolate reductase                                   |
| 590 | 10464128 | 5.1203741  | 0.0023239   | 0.0582572 | 1.4420932 | Casp7         | caspase 7                                                                  |
| 591 | 10566846 | 5.11628344 | 0.002329524 | 0.0582572 | 1.3357373 | Dennd5a       | DENN/MADD domain containing 5A                                             |
| 592 | 10516823 | 5.11742414 | 0.002327917 | 0.0582572 | 1.4545914 | Epb4.1        | erythrocyte protein band 4.1                                               |
| 593 | 10352097 | 5.11544693 | 0.002330328 | 0.0582572 | 1.1206592 | 1700016C15Rik | RIKEN cDNA 1700016C15 gene                                                 |
| 594 | 10517559 | 5.11178887 | 0.002339167 | 0.0582887 | 1.3226459 | Cdc42         | cell division cycle 42                                                     |
| 595 | 10533256 | 5.10470899 | 0.002355238 | 0.0585597 | 2.5163261 | Oas1a         | 2'-5' oligoadenylate synthetase 1A                                         |
| 596 | 10351163 | 5.09662979 | 0.002375327 | 0.0587999 | 1.1942522 | Scyl3         | SCY1-like 3 (S. cerevisiae)                                                |
| 597 | 10517883 | 5.09398176 | 0.002380952 | 0.0588745 | 1.7236847 | Necap2        | NECAP endocytosis associated 2                                             |
| 598 | 10517996 | 5.08698063 | 0.002393809 | 0.0590475 | 1.4802193 | Plekhm2       | pleckstrin homology domain containing, family M (with RUN domain) member 2 |
| 599 | 10405125 | 5.08361134 | 0.002405863 | 0.0591017 | 1.7627607 | Fbxw17        | F-box and WD-40 domain protein 17                                          |
| 600 | 10535780 | 5.07303438 | 0.002421934 | 0.0592527 | 1.1526578 | Flt3          | FMS-like tyrosine kinase 3                                                 |
| 601 | 10429128 | 5.07195272 | 0.002423541 | 0.0592527 | 1.88872   | Sla           | src-like adaptor                                                           |
| 602 | 10444056 | 5.06424246 | 0.002440416 | 0.0593416 | 1.2732644 | Daxx          | Fas death domain-associated protein                                        |

**Supplementary Table S5. Quantification of angiogenic factors in mammary tumors of nulliparous and parous mice in the presence or absence of *SNAI2*.** Angiogenic factors were quantified in the protein lysate of tumors developed by *Snai2* WT<sup>erbb2</sup> and *Snai2* KO<sup>erbb2</sup> mice by a multiplex bead array (Luminex assay): nulliparous mice, N=10 mice per group; parous mice, No=8 mice per group (n.d., non-detectable).

|                               | Nulliparous vs. Parous |              |
|-------------------------------|------------------------|--------------|
|                               | WT (p-value)           | KO (p-value) |
| <b>Angiopoietin-2</b>         | 0.0531                 | 0.7558       |
| <b>G-CSF</b>                  | 0.9645                 | 0.5052       |
| <b>sALK-1</b>                 | 0.7896                 | 0.5043       |
| <b>Leptin</b>                 | 0.1196                 | 0.1682       |
| <b>IL-1B</b>                  | 0.8933                 | 0.3026       |
| <b>EGF</b>                    | 0.4501                 | 0.2667       |
| <b>Endoglin</b>               | 1                      | 0.6251       |
| <b>FGF-2</b>                  | 0.894                  | 0.5634       |
| <b>Follistatin</b>            | 0.2667                 | 0.8242       |
| <b>HGF</b>                    | 0.3496                 | 0.8589       |
| <b>sCD31/PECAM-1</b>          | 0.3986                 | 0.6893       |
| <b>PLGF-2</b>                 | 0.6893                 | 0.8242       |
| <b>KC</b>                     | 0.0561                 | 0.3508       |
| <b>Prolactin</b>              | 0.8565                 | 0.5036       |
| <b>MIP-1a</b>                 | 0.8239                 | 0.3501       |
| <b>SDF-1</b>                  | 0.1824                 | 0.3281       |
| <b>VEGF-A</b>                 | 0.3508                 | 0.7558       |
| <b>TGFb1</b>                  | 0.5636                 | 0.5634       |
| <b>TGFb2</b>                  | 0.0832                 | 0.5636       |
| <b>TGFb3</b>                  | 0.4501                 | 0.0832       |
| <b>sFasL</b>                  | n.d.                   | n.d.         |
| <b>Amphiregulin</b>           | n.d.                   | n.d.         |
| <b>Betacellulin</b>           | n.d.                   | n.d.         |
| <b>IL-6</b>                   | n.d.                   | n.d.         |
| <b>Endothelin-1</b>           | n.d.                   | n.d.         |
| <b>IL-17A</b>                 | n.d.                   | n.d.         |
| <b>MCP-1</b>                  | n.d.                   | n.d.         |
| <b>VEGF-C</b>                 | n.d.                   | n.d.         |
| <b>VEGF-D</b>                 | n.d.                   | n.d.         |
| <b>TNF<math>\alpha</math></b> | n.d.                   | n.d.         |

**Supplementary Table S6. SNAI1 expression and breast cancer in *Snai2*-deficient mice.** A) Comparison between the proportion of SNAI1-positive cells in the stroma and epithelium of tumors quantified by immunohistochemistry (IHC) in different groups of mice (Mann-Whitney U test). B) Correlation between the proportion of SNAI1-positive stroma or epithelium cells in the tumors quantified by IHC with survival, tumor latency and the number of metastasis (Spearman's test). C) Comparison between the proportions of SNAI1-positive tumor stroma or epithelium cells quantified by IHC with the presence/absence of metastasis (Mann-Whitney U test).

| A.                         | Tissue zone | Nulliparous/Parous | <i>Snai2</i> WT <sup>ErbB2</sup><br>(N=19) | <i>Snai2</i> KO <sup>ErbB2</sup><br>(N=20) | p-value       |
|----------------------------|-------------|--------------------|--------------------------------------------|--------------------------------------------|---------------|
| Percentage of SNAI1+ cells | Stroma      | Nulliparous        | 11.15                                      | 23.84                                      | <b>0.05</b>   |
|                            |             | Parous             | 37.395                                     | 24.26                                      | <b>0.4963</b> |
|                            |             | p-value            | <b>0.03738</b>                             | <b>0.8798</b>                              |               |
|                            | Epithelium  | Nulliparous        | 76.59                                      | 85.865                                     | <b>0.8065</b> |
|                            |             | Parous             | 93.24                                      | 86.69                                      | <b>0.7624</b> |
|                            |             | p-value            | <b>0.3272</b>                              | <b>0.2568</b>                              |               |

| B.                                         |         | Survival                         |                                  | Latency                          |                                  | Number of metastasis             |                                  |
|--------------------------------------------|---------|----------------------------------|----------------------------------|----------------------------------|----------------------------------|----------------------------------|----------------------------------|
|                                            |         | <i>Snai2</i> WT <sup>ErbB2</sup> | <i>Snai2</i> KO <sup>ErbB2</sup> | <i>Snai2</i> WT <sup>ErbB2</sup> | <i>Snai2</i> KO <sup>ErbB2</sup> | <i>Snai2</i> WT <sup>ErbB2</sup> | <i>Snai2</i> KO <sup>ErbB2</sup> |
| <b>% of SNAI1+ cells in the stroma</b>     |         |                                  |                                  |                                  |                                  |                                  |                                  |
| Nulliparous                                | N       | 8                                | 10                               | 8                                | 10                               | 8                                | 10                               |
|                                            | p-value | <b>0.4927</b>                    | <b>0.1869</b>                    | <b>0.5479</b>                    | <b>0.6272</b>                    | <b>0.4226</b>                    | <b>0.836</b>                     |
|                                            | r       | -0.2857                          | 0.4545                           | -0.2515                          | 0.1758                           | -0.3314                          | -0.0754                          |
| Parous                                     | N       | 8                                | 10                               | 8                                | 10                               | 8                                | 10                               |
|                                            | p-value | <b>0.5653</b>                    | <b>0.4325</b>                    | <b>0.4346</b>                    | <b>0.26</b>                      | <b>0.5091</b>                    | <b>0.8792</b>                    |
|                                            | r       | 0.241                            | -0.2805                          | 0.3234                           | -0.3939                          | 0.2755                           | -0.0554                          |
| <b>% of SNAI1+ cells in the epithelium</b> |         |                                  |                                  |                                  |                                  |                                  |                                  |
| Nulliparous                                | N       | 8                                | 10                               | 8                                | 10                               | 8                                | 10                               |
|                                            | p-value | <b>0.5309</b>                    | <b>0.1276</b>                    | <b>0.6287</b>                    | <b>0.1497</b>                    | <b>0.8852</b>                    | <b>0.582</b>                     |
|                                            | r       | 0.2619                           | 0.5152                           | 0.2036                           | 0.4909                           | 0.0614                           | -0.1988                          |
| Parous                                     | N       | 8                                | 10                               | 8                                | 10                               | 8                                | 10                               |
|                                            | p-value | <b>0.2829</b>                    | <b>0.226</b>                     | <b>0.3652</b>                    | <b>0.9602</b>                    | <b>0.9775</b>                    | <b>0.3771</b>                    |
|                                            | r       | -0.4338                          | -0.4207                          | -0.3713                          | 0.0182                           | -0.012                           | -0.3139                          |

| C.                                         |         | Metastasis (yes/no)              |        |                                  |        |
|--------------------------------------------|---------|----------------------------------|--------|----------------------------------|--------|
|                                            |         | <i>Snai2</i> WT <sup>ErbB2</sup> |        | <i>Snai2</i> KO <sup>ErbB2</sup> |        |
|                                            |         | No                               | Yes    | No                               | Yes    |
| <b>% of SNAI1+ cells in the stroma</b>     |         |                                  |        |                                  |        |
| Nulliparous                                | N       | 3                                | 5      | 6                                | 4      |
|                                            | median  | 18.182                           | 10.952 | 23.84                            | 26.768 |
|                                            | p-value | <b>0.4561</b>                    |        | <b>0.8312</b>                    |        |
| Parous                                     | N       | 1                                | 7      | 2                                | 8      |
|                                            | median  | 5.405                            | 41.463 | 45.703                           | 24.26  |
|                                            | p-value | <b>0.2752</b>                    |        | <b>0.4334</b>                    |        |
| <b>% of SNAI1+ cells in the epithelium</b> |         |                                  |        |                                  |        |
| Nulliparous                                | N       | 3                                | 5      | 6                                | 4      |
|                                            | median  | 76.59                            | 76.193 | 86.196                           | 70.362 |
|                                            | p-value | <b>0.6547</b>                    |        | <b>0.6698</b>                    |        |
| Parous                                     | N       | 1                                | 7      | 2                                | 8      |
|                                            | median  | 16.223                           | 94.391 | 87.836                           | 86.693 |
|                                            | p-value | <b>0.2752</b>                    |        | <b>0.4334</b>                    |        |

**Supplementary Table S7. Total and phosphorylated levels of ERK1/2 and AKT in breast cancer from *Snai2* WT<sup>ErB2</sup> and *Snai2* KO<sup>ErB2</sup>, nulliparous and parous mice.**

Quantifications were assessed by ELISA. Mean (me) and standard deviation (sd) are shown.

Twenty mice per group were analyzed. Red, significant P-values. T-test.

|                                                                         | <b><i>Snai2</i> WT<sup>ERBB2</sup></b><br>(me ± sd) | <b><i>Snai2</i> KO<sup>ERBB2</sup></b><br>(me ± sd) | <i>P</i> -value    |
|-------------------------------------------------------------------------|-----------------------------------------------------|-----------------------------------------------------|--------------------|
| <b>Total ERK 1/2</b><br>Nulliparous<br>Parous<br><i>P</i> -value        | 2.9290 ±0.4326<br>3.2670 ±0.3454<br>0.0294          | 3.0420 ±0.3527<br>3.4440 ±0.2344<br>< 0.0001        | 0.3076<br>< 0.0001 |
| <b>pERK 1/2(pT202/Y204)</b><br>Nulliparous<br>Parous<br><i>P</i> -value | 0.309 ±0.07854<br>0.3525 ±0.08864<br>0.0145         | 0.356 ±0.154<br>0.658 ±0.2565<br>0.0006             | 0.1071<br>0.0002   |
| <b>Total AKT</b><br>Nulliparous<br>Parous<br><i>P</i> -value            | 0.171 ±0.1468<br>0.187 ±0.05973<br>0.5248           | 0.177 ±0.1613<br>0.392 ±0.197<br>0.002              | 0.528<br>0.0001    |
| <b>pAKT (T308)</b><br>Nulliparous<br>Parous<br><i>P</i> -value          | 0.219 ±0.04706<br>0.258 ±0.0759<br>0.044            | 0.241 ±0.1269<br>0.462 ±0.2002<br>0.0005            | 0.2846<br>0.0001   |
| <b>pAKT1 (S473)</b><br>Nulliparous<br>Parous<br><i>P</i> -value         | 0.366 ±0.218<br>0.387 ±0.09257<br>0.6263            | 0.397 ±0.2466<br>0.741 ±0.2649<br>0.002             | 0.4142<br>< 0.0001 |

**Supplementary Table S8. Correlation of total and phosphorylated ERK1/2 and AKT levels with survival and tumor latency.** Protein levels were quantified by ELISA (Spearman's correlation: red: statistically significant values; blue, values with a trend towards significance).

|                            |                 | Survival                         |                                  | Latency                          |                                  |
|----------------------------|-----------------|----------------------------------|----------------------------------|----------------------------------|----------------------------------|
|                            |                 | <i>Snai2</i> WT <sup>ErbB2</sup> | <i>Snai2</i> KO <sup>ErbB2</sup> | <i>Snai2</i> WT <sup>ErbB2</sup> | <i>Snai2</i> KO <sup>ErbB2</sup> |
| <b>Total ERK1/2</b>        |                 |                                  |                                  |                                  |                                  |
| Nulliparous                | <i>P</i> -value | 0.933                            | 0.979                            | 0.758                            | 0.870                            |
|                            | <i>r</i>        | -0.020                           | 0.006                            | -0.073                           | -0.039                           |
| Parous                     | <i>P</i> -value | 0.974                            | 0.205                            | 0.761                            | 0.279                            |
|                            | <i>r</i>        | -0.008                           | -0.296                           | 0.075                            | -0.254                           |
| <b>ERK1/2 (pT202/Y204)</b> |                 |                                  |                                  |                                  |                                  |
| Nulliparous                | <i>P</i> -value | 0.214                            | 0.411                            | 0.446                            | 0.373                            |
|                            | <i>r</i>        | 0.291                            | 0.195                            | 0.181                            | 0.211                            |
| Parous                     | <i>P</i> -value | 0.976                            | <b>0.075</b>                     | 0.512                            | <b>0.009</b>                     |
|                            | <i>r</i>        | -0.007                           | 0.406                            | -0.156                           | 0.566                            |
| <b>Total AKT</b>           |                 |                                  |                                  |                                  |                                  |
| Nulliparous                | <i>P</i> -value | 0.224                            | 0.139                            | 0.485                            | 0.102                            |
|                            | <i>r</i>        | 0.285                            | 0.343                            | 0.166                            | 0.376                            |
| Parous                     | <i>P</i> -value | 0.573                            | <b>0.016</b>                     | 0.332                            | <b>0.011</b>                     |
|                            | <i>r</i>        | -0.138                           | 0.532                            | -0.229                           | 0.601                            |
| <b>AKT (pT308)</b>         |                 |                                  |                                  |                                  |                                  |
| Nulliparous                | <i>P</i> -value | 0.191                            | 0.242                            | 0.436                            | 0.177                            |
|                            | <i>r</i>        | 0.305                            | 0.274                            | 0.185                            | 0.314                            |
| Parous                     | <i>P</i> -value | 0.771                            | <b>0.087</b>                     | 0.566                            | <b>0.014</b>                     |
|                            | <i>r</i>        | -0.071                           | 0.403                            | -0.137                           | 0.552                            |
| <b>AKT1 (pS473)</b>        |                 |                                  |                                  |                                  |                                  |
| Nulliparous                | <i>P</i> -value | 0.206                            | 0.103                            | 0.427                            | 0.742                            |
|                            | <i>r</i>        | 0.295                            | 0.375                            | 0.194                            | 0.081                            |
| Parous                     | <i>P</i> -value | 0.913                            | <b>0.015</b>                     | 0.611                            | <b>0.002</b>                     |
|                            | <i>r</i>        | -0.027                           | 0.536                            | -0.121                           | 0.657                            |

**Supplementary Table S9. Age of mice used in all experiments involving animals and showed in the figures across the manuscript. (\*) Tissue microarray (TMA) experiments, including the assessment of Ki-67, Caspase-3, ERBB2, pERBB2 and SNAI1 by immunohistochemistry.**

|    | Genotype | Nulliparous / Parous | Age (weeks) | ELISA | Expression Array | Tissue array studies (TMA) (*) |
|----|----------|----------------------|-------------|-------|------------------|--------------------------------|
| 1  | WT       | Nulliparous          | 68.14       | ELISA |                  | TMA                            |
| 2  | WT       | Nulliparous          | 39.43       | ELISA |                  |                                |
| 3  | WT       | Nulliparous          | 45.57       | ELISA |                  |                                |
| 4  | WT       | Nulliparous          | 44.57       | ELISA |                  |                                |
| 5  | WT       | Nulliparous          | 77.57       | ELISA |                  |                                |
| 6  | WT       | Nulliparous          | 62.57       | ELISA |                  |                                |
| 7  | WT       | Nulliparous          | 40.57       | ELISA |                  |                                |
| 8  | WT       | Nulliparous          | 57.57       | ELISA |                  |                                |
| 9  | WT       | Nulliparous          | 58.43       | ELISA |                  |                                |
| 10 | WT       | Nulliparous          | 40.43       | ELISA |                  |                                |
| 11 | WT       | Nulliparous          | 56.43       | ELISA |                  | TMA                            |
| 12 | WT       | Nulliparous          | 61.29       | ELISA |                  | TMA                            |
| 13 | WT       | Nulliparous          | 51.00       | ELISA |                  | TMA                            |
| 14 | WT       | Nulliparous          | 50.29       | ELISA |                  | TMA                            |
| 15 | WT       | Nulliparous          | 55.71       | ELISA |                  | TMA                            |
| 16 | WT       | Nulliparous          | 67.14       | ELISA | ARRAY            |                                |
| 17 | WT       | Nulliparous          | 75.14       | ELISA | ARRAY            |                                |
| 18 | WT       | Nulliparous          | 72.14       | ELISA | ARRAY            |                                |
| 19 | WT       | Nulliparous          | 71.71       | ELISA | ARRAY            | TMA                            |
| 20 | WT       | Nulliparous          | 59.14       | ELISA |                  |                                |
| 21 | WT       | Nulliparous          | 66.57       |       |                  | TMA                            |
| 22 | WT       | Nulliparous          | 62.43       |       |                  | TMA                            |
| 23 | KO       | Nulliparous          | 59.71       | ELISA |                  |                                |
| 24 | KO       | Nulliparous          | 44.29       | ELISA |                  |                                |
| 25 | KO       | Nulliparous          | 50.43       | ELISA |                  |                                |
| 26 | KO       | Nulliparous          | 49.71       | ELISA |                  |                                |
| 27 | KO       | Nulliparous          | 45.00       | ELISA |                  |                                |
| 28 | KO       | Nulliparous          | 51.29       | ELISA |                  |                                |
| 29 | KO       | Nulliparous          | 55.00       | ELISA |                  | TMA                            |
| 30 | KO       | Nulliparous          | 42.29       | ELISA |                  | TMA                            |
| 31 | KO       | Nulliparous          | 38.86       | ELISA |                  | TMA                            |
| 32 | KO       | Nulliparous          | 38.29       | ELISA |                  | TMA                            |
| 33 | KO       | Nulliparous          | 42.71       | ELISA |                  | TMA                            |
| 34 | KO       | Nulliparous          | 40.00       | ELISA |                  | TMA                            |
| 35 | KO       | Nulliparous          | 77.00       | ELISA |                  |                                |
| 36 | KO       | Nulliparous          | 62.71       | ELISA | ARRAY            |                                |
| 37 | KO       | Nulliparous          | 105.57      | ELISA | ARRAY            | TMA                            |
| 38 | KO       | Nulliparous          | 93.71       | ELISA | ARRAY            | TMA                            |
| 39 | KO       | Nulliparous          | 73.14       | ELISA |                  | TMA                            |
| 40 | KO       | Nulliparous          | 51.57       | ELISA | ARRAY            | TMA                            |
| 41 | KO       | Nulliparous          | 44.00       | ELISA |                  |                                |
| 42 | KO       | Nulliparous          | 46.00       | ELISA |                  |                                |
| 43 | WT       | Parous               | 79.14       | ELISA | ARRAY            |                                |

|    |    |        |       |       |       |     |
|----|----|--------|-------|-------|-------|-----|
| 44 | WT | Parous | 42.43 | ELISA |       |     |
| 45 | WT | Parous | 40.43 | ELISA |       |     |
| 46 | WT | Parous | 54.14 | ELISA |       |     |
| 47 | WT | Parous | 43.29 | ELISA |       |     |
| 48 | WT | Parous | 40.43 | ELISA |       |     |
| 49 | WT | Parous | 39.29 | ELISA |       |     |
| 50 | WT | Parous | 58.29 | ELISA |       |     |
| 51 | WT | Parous | 58.29 | ELISA |       |     |
| 52 | WT | Parous | 42.29 | ELISA |       |     |
| 53 | WT | Parous | 44.71 | ELISA |       | TMA |
| 54 | WT | Parous | 20.00 | ELISA |       | TMA |
| 55 | WT | Parous | 53.29 | ELISA |       | TMA |
| 56 | WT | Parous | 53.29 | ELISA |       | TMA |
| 57 | WT | Parous | 55.14 | ELISA |       | TMA |
| 58 | WT | Parous | 54.29 | ELISA |       | TMA |
| 59 | WT | Parous | 64.57 | ELISA | ARRAY |     |
| 60 | WT | Parous | 58.29 | ELISA | ARRAY |     |
| 61 | WT | Parous | 65.00 | ELISA | ARRAY |     |
| 62 | WT | Parous | 54.29 | ELISA |       |     |
| 63 | KO | Parous | 45.14 | ELISA |       |     |
| 64 | KO | Parous | 45.14 | ELISA |       |     |
| 65 | KO | Parous | 50.00 | ELISA |       |     |
| 66 | KO | Parous | 46.14 | ELISA |       |     |
| 67 | KO | Parous | 49.00 | ELISA |       |     |
| 68 | KO | Parous | 46.71 | ELISA |       | TMA |
| 69 | KO | Parous | 53.57 | ELISA |       | TMA |
| 70 | KO | Parous | 58.71 | ELISA |       | TMA |
| 71 | KO | Parous | 47.00 | ELISA |       | TMA |
| 72 | KO | Parous | 45.86 | ELISA |       | TMA |
| 73 | KO | Parous | 41.86 | ELISA |       | TMA |
| 74 | KO | Parous | 38.14 | ELISA |       | TMA |
| 75 | KO | Parous | 43.00 | ELISA |       | TMA |
| 76 | KO | Parous | 41.86 | ELISA |       | TMA |
| 77 | KO | Parous | 36.00 | ELISA |       | TMA |
| 78 | KO | Parous | 93.00 | ELISA | ARRAY |     |
| 79 | KO | Parous | 75.43 | ELISA | ARRAY |     |
| 80 | KO | Parous | 60.00 | ELISA | ARRAY |     |
| 81 | KO | Parous | 66.00 | ELISA | ARRAY |     |
| 82 | KO | Parous | 66.00 | ELISA | ARRAY |     |
| 83 | KO | Parous | 57.86 |       |       | TMA |
